# Supplementary material for: Versatile human cardiac tissues engineered with perfusable heart extracellular microenvironment for biomedical applications
Source: PubMed Central journal article supplement (PMC10960018; doi:10.1038/s41467-024-46928-y), 2024-03-22
Supplement: 41467_2024_46928_MOESM1_ESM.pdf [file 41467_2024_46928_MOESM1_ESM.pdf]

1 **Supplementary Information**

2 **Versatile human cardiac tissues engineered with perfusable heart**  
3 **extracellular microenvironment for biomedical applications**

4 Sungjin Min<sup>1#</sup>, Suran Kim<sup>1,2#</sup>, Woo-Sup Sim<sup>3,4#</sup>, Yi Sun Choi<sup>1</sup>, Hyebin Joo<sup>1</sup>, Jae-Hyun  
5 Park<sup>3,4</sup>, Su-Jin Lee<sup>5</sup>, Hyeok Kim<sup>3,4</sup>, Mi Jeong Lee<sup>1</sup>, Inhea Jeong<sup>6</sup>, Baofang Cui<sup>1</sup>, Sung-Hyun  
6 Jo<sup>7</sup>, Jin-Ju Kim<sup>3,4</sup>, Seok Beom Hong<sup>8</sup>, Yeon-Jik Choi<sup>9</sup>, Kiwon Ban<sup>10</sup>, Yun-Gon Kim<sup>7</sup>, Jang-  
7 Ung Park<sup>6,11,12,13</sup>, Hyang-Ae Lee<sup>5</sup>, Hun-Jun Park<sup>3,4,14\*</sup>, Seung-Woo Cho<sup>1,2,12,13\*</sup>

8  
9 <sup>1</sup>Department of Biotechnology, Yonsei University, Seoul 03722, Republic of Korea

10 <sup>2</sup>Cellartgen, Seoul 03722, Republic of Korea

11 <sup>3</sup>Department of Biomedicine & Health Sciences, College of Medicine, The Catholic  
12 University of Korea, Seoul 06591, Republic of Korea

13 <sup>4</sup>Division of Cardiology, Department of Internal Medicine, Seoul St. Mary's Hospital, The  
14 Catholic University of Korea, Seoul 06591, Republic of Korea

15 <sup>5</sup>Department of Predictive Toxicology, Korea Institute of Toxicology, Daejeon 34114,  
16 Republic of Korea

17 <sup>6</sup>Department of Materials Science and Engineering, Yonsei University, Seoul 03722, Republic  
18 of Korea

19 <sup>7</sup>Department of Chemical Engineering, Soongsil University, Seoul 06978, Republic of Korea

20 <sup>8</sup>Department of Thoracic and Cardiovascular Surgery, Seoul St. Mary's Hospital, College of  
21 Medicine, The Catholic University of Korea, Seoul 06591, Republic of Korea

22 <sup>9</sup>Division of Cardiology, Department of Internal Medicine, Eunpyeong St. Mary's Hospital,  
23 College of Medicine, The Catholic University of Korea, Seoul 03312, Republic of Korea

24 <sup>10</sup>Department of Biomedical Sciences, City University of Hong Kong, Kowloon 999077,  
25 Hong Kong

26 <sup>11</sup>Department of Neurosurgery, Yonsei University College of Medicine, Seoul 03722,  
27 Republic of Korea

28 <sup>12</sup>Center for Nanomedicine, Institute for Basic Science (IBS), Seoul 03722, Republic of  
29 Korea

30 <sup>13</sup>Graduate Program of Nano Biomedical Engineering (NanoBME), Advanced Science  
31 Institute, Yonsei University, Seoul 03722, Republic of Korea

32 <sup>14</sup>Cell Death Disease Research Center, College of Medicine, The Catholic University of  
33 Korea, Seoul 06591, Republic of Korea

34  
35 #S. Min, S. Kim, and W. S. Sim equally contributed to this work.

36 \*To whom correspondence should be addressed: [seungwoocho@yonsei.ac.kr](mailto:seungwoocho@yonsei.ac.kr) or  
37 [cardioman@catholic.ac.kr](mailto:cardioman@catholic.ac.kr)

## 38 **Supplementary Methods**

### 39 **Characterization of heart extracellular matrix (HEM)**

40 The amounts of dsDNA, glycosaminoglycan (GAG), and collagen in decellularized heart  
41 tissues were quantified and compared with those of native heart tissues. dsDNA from  
42 lyophilized HEM and native heart tissues was extracted using a DNA extraction kit (#9765A,  
43 TaKaRa, Shiga, Japan) according to the manufacturer's instructions. The GAG content in  
44 HEM and native heart tissues was determined using a 1,9-dimethylmethylene blue (DMMB)  
45 assay (Sigma-Aldrich, St. Louis, MO, USA) with a modification from a previous protocol<sup>1</sup>.  
46 Lyophilized HEM and native heart tissues were digested with 150 µg/ml papain (Sigma-  
47 Aldrich) and 10 mM N-acetyl-L-cysteine (Sigma-Aldrich) at 60°C overnight. Chondroitin  
48 sulfate (Sigma-Aldrich) was used as a standard with serial dilutions from 40 µg/ml. After  
49 adding DMMB solution, the GAG content in HEM and native tissues was quantified by  
50 measuring absorbance at 525 nm on a microplate reader (Tecan, Männedorf, Switzerland).  
51 The amount of collagen in HEM and native tissues was assessed using a Sircol™ Soluble  
52 Collagen Assay (Biocolor, Carrickfergus, UK) following the manufacturer's protocols.

53

### 54 **Characterization of HEM hydrogels**

55 The viscoelastic properties of the hydrogels were examined using a rotating rheometer (MCR  
56 102, Anton Paar, Graz, Austria) with an 8 mm parallel plate. A frequency sweep mode was  
57 performed to measure the storage moduli ( $G'$ ) and loss moduli ( $G''$ ) of the hydrogels across a  
58 frequency of 0.1 to 10 Hz at a constant strain of 1%. The elastic moduli of the hydrogels were  
59 obtained based on the storage moduli of hydrogels measured at a frequency of 1 Hz.

60 To examine the internal architecture of the HEM hydrogels, the samples were fixed  
61 with 10% neutral buffer formalin (Thermo Fisher Scientific, Waltham, MA, USA) for 10 min  
62 and subjected to dehydration with a progressively increasing concentration of ethanol as

63 follows: 50%, 60%, 70%, 80%, 90%, and 100%. Subsequently, the hydrogels were immersed  
64 in tert-butyl alcohol (TCI, Tokyo, Japan) and stored at  $-80^{\circ}\text{C}$ . For the imaging with field  
65 emission scanning electron microscopy (FE-SEM), the frozen HEM hydrogels were  
66 lyophilized using a freeze dryer (FDU-2100, Eyela, Tokyo, Japan) under a vacuum pressure  
67 of 8.5 Pa and a trap temperature of  $-85^{\circ}\text{C}$ . The internal architecture of the hydrogels was  
68 observed using FE-SEM (JSM-7800F, JEOL Ltd., Tokyo, Japan).

69

### 70 ***In vitro* and *in vivo* biocompatibility evaluation of HEM**

71 *In vitro* immunogenicity was assessed by examining the levels of inflammatory cytokines  
72 released from macrophages co-cultured with HEM hydrogels. Murine RAW 264.7

73 macrophage cells were seeded in 24-well plates at a density of  $1.0 \times 10^6$  cells/well and

74 cultured in Dulbecco's Modified Eagle Medium (DMEM) containing 10% fetal bovine serum  
75 (FBS, Thermo Fisher Scientific) and 1% penicillin-streptomycin (PS) for 24 h at  $37^{\circ}\text{C}$ .

76 Medium in each well was replaced with fresh medium the following day. For co-culture with  
77 HEM hydrogel, 50  $\mu\text{l}$  of 5 mg/ml HEM hydrogel was placed on Transwell inserts (Corning,  
78 Corning, NY, USA) in each well. Fresh medium with or without 1  $\mu\text{g}/\text{ml}$  lipopolysaccharide  
79 (LPS, Sigma-Aldrich) was utilized as positive and negative controls, respectively.

80 Supernatants were collected after 6 h of incubation. The secretion levels of tumor necrosis  
81 factor-alpha (TNF- $\alpha$ ) were determined by enzyme-linked immunosorbent assay (ELISA)  
82 using a mouse TNF- $\alpha$  ELISA kit (R&D Systems, Minneapolis, MN, USA) following the  
83 manufacturer's instructions. Endotoxin testing of HEM hydrogels was performed using a  
84 Pierce<sup>TM</sup> Chromogenic Endotoxin Quant Kit (Thermo Fisher Scientific) following the  
85 manufacturer's protocol.

86 The *in vivo* biocompatibility of the HEM hydrogels was evaluated by subcutaneous  
87 injection of 200  $\mu\text{l}$  of 5 mg/ml HEM into BALB/c nude mice (CAnN.Cg-Foxn1 nu/CrlOri, 4-

88 week-old male, 20 g; Orient Bio Inc., Seongnam, Korea). Only male mice were employed to  
89 minimize variation of results according to biological sex differences.<sup>2</sup> These experiments  
90 were approved by the Institutional Animal Care and Use Committee (IACUC) of the Yonsei  
91 Laboratory Animal Research Center (YLARC) (permit number: IACUC-A-202111-1373-04).  
92 All mice were maintained in the housing condition with a temperature of  $21 \pm 2$  °C, a  
93 humidity of  $50 \pm 10\%$ , ventilation of 10–15/h, the light of 150–300 Lux, and noise of less  
94 than 60 dB. After 1, 4, or 7 days post-injection, mice were sacrificed and skin tissues adjacent  
95 to the hydrogels were harvested. The skin tissues were fixed with a 10% formalin solution for  
96 12 h, washed with PBS, and embedded in paraffin. Paraffin-embedded skin samples were cut  
97 to a thickness of 6  $\mu\text{m}$  and stained with hematoxylin and eosin (H&E) and toluidine blue  
98 (TB) to assess necrosis and recruitment and infiltration of immune cells at injection sites. The  
99 number of fibroblasts and immune cells at the sites of HEM injection was quantified through  
100 immunostaining for fibroblasts ( $\alpha$ -smooth muscle actin ( $\alpha$ -SMA) and Collagen type 1),  
101 immune cells (CD11b and CD45), M1 macrophages (inducible nitric oxide synthase (iNOS)  
102 and CD80), and M2 macrophages (CD206 and CD163). The M1/M2 ratio was calculated by  
103 dividing the number of iNOS<sup>+</sup> M1 macrophages by that of CD206<sup>+</sup> M2 macrophages or by  
104 dividing the number of CD80<sup>+</sup> M1 macrophages by that of CD163<sup>+</sup> M2 macrophages.

105

#### 106 **Protein sample preparation for mass spectrometry**

107 Decellularized heart tissues were cut into small fragments, and proteins in the tissue samples  
108 were extracted using a Filter Aided Sample Preparation (FASP) Protein Digest kit (Abcam,  
109 Cambridge, UK) with modifications of the manufacturer's protocol. Tissue samples were  
110 reduced with 10 mM 1,4-dithiothreitol (DTT, Sigma-Aldrich) in 50 mM ammonium  
111 bicarbonate for 30 min at 60°C. Then, tissue samples were alkylated with 55 mM  
112 iodoacetamide in urea solution for 30 min in the dark and digested with trypsin (1:50 enzyme

113 to protein, Sigma-Aldrich) for 16 h at 37°C. The next day, digested peptide samples were  
114 centrifuged at 7,500 g for 2 min, and the resulting peptide solutions were desalted using  
115 Pierce™ Peptide Desalting Spin Columns (Thermo Fisher Scientific). The desalted peptide  
116 samples were dried in a speed vacuum concentrator (Eyela) at room temperature for 5 h and  
117 resuspended in 0.1% (v/v) formic acid and 2% (v/v) acetonitrile solution. Peptide  
118 concentrations were quantified using a Pierce™ Quantitative Colorimetric Peptide Assay  
119 (Thermo Fisher Scientific) and adjusted to 0.5 mg/ml.

120

### 121 **Liquid chromatography with tandem mass spectrometry (LC-MS/MS) and data** 122 **processing**

123 Peptide samples were analyzed using an Ultimate 3000 RSLCnano System (Thermo Fisher  
124 Scientific) and Q-Exactive Orbitrap HF-X (Thermo Fisher Scientific). For peptide separation,  
125 two columns were used: Acclaim PepMap RSLC C18 (75 µm × 50 cm, filled with 2-µm C18  
126 particles, Thermo Fisher Scientific) as the analytical column and Acclaim PepMap 100 (75  
127 µm × 2 cm filled with 3-µm C18 particles, Thermo Fisher Scientific) as the trap column.  
128 Solvent A (0.1% formic acid) and solvent B (0.1% formic acid in acetonitrile) were applied  
129 for a 125-min LC gradient run at a constant flow of 0.270 µl/min. The LC gradient consisted  
130 of the following: equilibration to 5% solvent B (5 min), 5% to 10% solvent B (5 min), 10% to  
131 35% solvent B (65 min), 35% to 50% solvent B (10 min), 50% to 80% solvent B for (1 min),  
132 maintenance in 80% solvent B (18 min), 80% to 5% solvent B (1 min), and equilibration at  
133 5% solvent B (20 min). MS was operated in positive ion mode with spray voltage at 1.8 kV  
134 and capillary temperature at 250°C. A full MS scan was obtained with the following  
135 parameters: scan range of 400–2000 m/z with a full MS resolution of 60,000, automated gain  
136 control target at  $3 \times 10^6$ , and a maximum injection time of 100 msec. As for the MS/MS scan,  
137 parameters were set to a resolution of 15,000, automated gain control target of  $1 \times 10^5$ ,

138 maximum injection time of 100 msec, normalized collision energy of 27, and dynamic  
139 exclusion of 30 sec.

140 Raw data from LC-MS/MS were processed using MaxQuant (2.0.3.0)<sup>3</sup>. MS and  
141 MS/MS spectra were searched against *Sus scrofa* (released in March 2021) in the UniProt  
142 database<sup>4</sup>. Label-free quantification (LFQ) was conducted with specific enzyme digestion set  
143 to trypsin/P with a maximum of two missed cleavages. Cysteine carbamidomethylation was  
144 included as a fixed modification, and methionine oxidation and N-terminal acetylation were  
145 specified as variable modifications. Peptides and proteins were filtered by setting the  
146 threshold of the peptide-to-spectrum match (PSM) false discovery rate (FDR) and protein  
147 FDR to 0.01. A match between runs was performed, and an intensity-based absolute  
148 quantification (iBAQ) algorithm was used to quantify the level of proteins present in the  
149 samples. The iBAQ represents a molar abundance of proteins within the samples.

150

### 151 **Proteomic analysis of HEM**

152 The protein compositions of HEM samples (A#1, A#2, A#3, B, and C) and growth factor  
153 reduced Matrigel (GFR-Matrigel) were compared by applying relative iBAQ (riBAQ).  
154 riBAQ values were calculated by dividing the iBAQ of a protein by the total protein iBAQ,  
155 referring to the relative abundance of proteins within samples. Using the Matrisome Project  
156 database<sup>5</sup>, matrisome proteins in HEM and GFR-Matrigel were identified and categorized.  
157 Protein expression in HEM and GFR-Matrigel was compared to that of native heart tissue  
158 from the Human Protein Atlas<sup>6</sup>; proteins that were elevated at least 4-fold compared to other  
159 tissues were defined as heart-enriched proteins.

160 Functional annotation was performed using Gene Ontology Biological Processes  
161 (GOBP)<sup>7, 8</sup> by searching against *Sus scrofa*. The PANTHER Overrepresentation Test (Release  
162 20210224) was used, and Fisher's Exact statistical tests were applied with FDR correction.

163 Principal component analysis (PCA) and Pearson's correlation analysis were performed using  
164 GraphPad Prism 9 (GraphPad, La Jolla, CA, USA) by computing two-tailed Pearson's  
165 correlation coefficients (r) with 95% confidence intervals.

166

### 167 **Human induced pluripotent stem cell (hiPSC) culture**

168 The study utilizing hiPSCs was approved by the Institutional Review Board (IRB) of Yonsei  
169 University (permit number: 7001988-202004-BR-844-01E). Most experiments were  
170 performed using the KYOU-DXR0109B hiPSC line (female) obtained from the American  
171 Type Culture Collection (ATCC, Manassas, VA, USA). The GM25305 hiPSC line (LQT2  
172 hiPSC, female) obtained from the Coriell Institute for Medical Research (Camden, NJ, USA)  
173 was used for LQTS modeling. For cardiac tissue transplantation experiments, red  
174 fluorescence protein (RFP)-expressing hiPSCs were generated using CMC-iPSC-011  
175 (CMC11-iPSCs, male) obtained from the Catholic iPSC Research Center in the Catholic  
176 University of Korea (Seoul, Korea). All hiPSCs were cultured in cell culture plates coated  
177 with human embryonic stem cell (hESC)-qualified Matrigel (Corning) in mTeSR Plus  
178 medium (StemCell Technologies, Vancouver, Canada). hiPSCs were passaged every 5–7 days  
179 using ReLeSR (StemCell Technologies) and regularly assessed for mycoplasma  
180 contamination using a MycoAlert Mycoplasma Detection Kit (Lonza, Basel, Switzerland).

181

### 182 **Generation of RFP-expressing hiPSCs (RFP-hiPSCs)**

183 hiPSCs expressing RFP (tdTomato) were generated using the pEF1 $\alpha$ -tdTomato vector  
184 (631975, Clontech, Mountain View, CA, USA). Briefly, plasmid DNA (500 ng) was  
185 transfected into hiPSCs using Lipofectamine™ Stem (STEM00001, Thermo Fisher  
186 Scientific) according to the manufacturer's instructions. Neomycin-resistant clones were  
187 isolated using selective antibiotics (10131027, Thermo Fisher Scientific). Finally, hiPSC

188 colonies expressing the RFP signal were sorted by flow cytometry on a FACSAria™ Fusion  
189 (BD Biosciences, San Jose, CA, USA). Purified fractions of RFP-hiPSC colonies were  
190 expanded for further differentiation into cardiomyocytes (CMs). The expression of RFP and  
191 the pluripotency of RFP-hiPSCs were analyzed on a FACSCanto II (BD Biosciences) with  
192 FlowJo software (version 10.8.1, Tree Star Inc., Ashland, OR, USA). Staining was conducted  
193 using BV421 mouse anti-Oct3/4 (565644, BD Biosciences) or BV421 mouse IgG1, k isotype  
194 control (562438, BD Biosciences).

195

### 196 **hiPSC differentiation into cardiomyocytes (CMs) and cardiac fibroblasts (CFs)**

197 CMs were differentiated from hiPSCs according to a reported protocol<sup>9</sup>. In detail, hiPSCs  
198 were dissociated and seeded in 6-well-culture plates coated with hESC-qualified Matrigel at a  
199 density of  $3.5\text{--}4.5 \times 10^5$  cells per well in Essential 8 medium (Thermo Fisher Scientific)  
200 supplemented with 10  $\mu\text{M}$  Rho kinase inhibitor Y-27632 (BioGems International, Inc.,  
201 Westlake Village, CA, USA). When cells reached 80–90% confluency, differentiation was  
202 initiated by treating cells with 10  $\mu\text{M}$  CHIR99021 (LC Laboratories, Woburn, MA, USA) in  
203 RPMI/B27-I medium composed of RPMI 1640 (Thermo Fisher Scientific) supplemented  
204 with B27 supplement minus insulin (Thermo Fisher Scientific). After 24 h, medium was  
205 replaced with RPMI/B27-I medium. After 48 h, cells were treated with 5  $\mu\text{M}$  IWP4 Wnt  
206 inhibitor (Stemgent, Cambridge, MA, USA) in RPMI/B27-I medium for 48 h. From day 5 of  
207 treatment, RPMI/B27-I medium was replaced every other day, and from day 9, RPMI/B27  
208 medium composed of RPMI 1640 supplemented with insulin-containing B27 (Thermo Fisher  
209 Scientific) was added. RPMI/B27 medium was replaced every other day until beating CMs  
210 were observed. For purification of CMs, cells were treated with glucose-free RPMI (Thermo  
211 Fisher Scientific) supplemented with 5 mM sodium DL-lactate (Sigma-Aldrich), 0.211 mg/ml  
212 L-ascorbic acid 2-phosphate (Sigma-Aldrich), and 0.5 mg/ml human albumin (Sigma-



213 Aldrich).

214 Differentiation of RFP-hiPSCs into CMs utilized the same protocol with slight  
215 modifications. Cells were treated with 6  $\mu\text{M}$  CHIR99021 in RPMI/B27-I medium for 48 h,  
216 after which medium was replaced with RPMI/B27-I medium. After 24 h, 5  $\mu\text{M}$  IWR-1-endo  
217 (Cayman Chemical, Ann Arbor, MI, USA) in RPMI/B27-I medium was added to the cells for  
218 48 h. From day 5 after treatment, RPMI/B27 medium was replaced every other day.

219 CF differentiation from hiPSCs was conducted as reported<sup>10</sup>. In detail, hiPSCs at 80–  
220 90% confluency were cultured in RPMI/B27-I medium containing 6  $\mu\text{M}$  CHIR99021 for 2  
221 days, RPMI/B27-I medium for 1 day, and RPMI/B27-I medium containing 5  $\mu\text{M}$  IWR-1  
222 (Sigma-Aldrich) for 2 days. Differentiated cells were replated on hESC-qualified Matrigel-  
223 coated culture plates and treated with 5  $\mu\text{M}$  CHIR99021 and 2  $\mu\text{M}$  retinoic acid (Sigma-  
224 Aldrich) in Advanced DMEM/F12 medium (Thermo Fisher Scientific) for 3 days and then  
225 cultured in Advanced DMEM/F12 medium without supplements for 4 days. Cells were  
226 replated once more and cultured in Fibroblast Growth Medium-3 (PromoCell, Heidelberg,  
227 Germany) containing 10 ng/ml FGF2 (R&D Systems) and 10  $\mu\text{M}$  SB431542 (Sigma-Aldrich)  
228 for 6 days.

229

### 230 **Computational simulation analysis and oxygen level detection**

231 Computational simulations were performed using the Laminar Flow interface and the  
232 Transport of Diluted Species interface with COMSOL Multiphysics software (COMSOL Inc.,  
233 Burlington, MA, USA). Flow in the device system was solved using the Navier-Stokes  
234 equation and oxygen transport was determined using both convection and diffusion. The  
235 values used for the simulations were based on previously reported studies. Density and  
236 dynamic viscosity of the medium were set at 1030 kg/m<sup>3</sup> and 0.0025 Pa·s, respectively, for  
237 simulation<sup>11</sup>. In the simulation of oxygen transport, the oxygen concentration in the medium

238 was set at 222.5  $\mu\text{M}$  and the diffusion coefficient of the oxygen in the medium and in the  
239 spheroid was set at  $2.4 \times 10^{-5} \text{ cm}^2/\text{s}$  and  $3.0 \times 10^{-6} \text{ cm}^2/\text{s}$ , respectively, according to previous  
240 studies<sup>12, 13</sup>. The oxygen consumption rate of the cardiac tissue was estimated to be 0.45  
241 pmol/cell/h, according to a previous study<sup>14</sup>. The oxygen levels of cardiac tissues were  
242 detected using the Image-iT™ red hypoxia reagent (Thermo Fisher Scientific), as used in  
243 previous research on cardiac spheroids<sup>13</sup>. Fluorescence images of live cardiac tissues treated  
244 with the hypoxia reagent were taken using confocal microscopy, maintaining the same  
245 thickness from the bottom of the cardiac tissues. A series of 15 z-slice confocal images were  
246 captured at intervals of 10.03  $\mu\text{m}$  and then stacked to generate a z-stack image with a total  
247 thickness of 140.42  $\mu\text{m}$ . Then, the relative fluorescence intensity and fluorescence area (%)  
248 of cardiac tissues in each group were quantified using ImageJ software (National Institutes of  
249 Health, Bethesda, MD, USA).

250

## 251 **Histology**

252 Decellularized porcine heart tissues, native porcine heart tissues, HEM hydrogel-injected  
253 mouse skin tissues, and cardiac tissue-transplanted rat heart tissues were fixed with 10%  
254 formalin solution (Thermo Fisher Scientific) for 12 h, embedded in paraffin blocks, and  
255 sectioned to 6- $\mu\text{m}$  (for HEM characterization) or 5- $\mu\text{m}$  (for transplantation experiments)  
256 thicknesses. Cardiac tissues produced *in vitro* were fixed with 10% formalin solution for 1 h,  
257 embedded in OCT compound (Leica Biosystems, Wetzlar, Germany), and frozen. OCT-  
258 embedded frozen samples were sectioned to 8- $\mu\text{m}$  thickness. Slides were stained with H&E,  
259 Alcian blue, and Masson's trichrome according to the manufacturer's instructions. Imaging  
260 was performed using a VS120-S5 slide scanner (Olympus Corporation, Tokyo, Japan) and a  
261 Panoramic MIDI slide scanner (3DHISTECH, Budapest, Hungary).

262

263 **Immunostaining**

264 OCT-embedded cardiac tissue sections or fixed whole cardiac tissues (for whole-mount  
265 staining) were permeabilized with 0.5% Triton X-100 (Sigma-Aldrich) for 30 min at room  
266 temperature. Paraffin-embedded tissue sections, including HEM hydrogel-injected mouse  
267 skin tissues and cardiac tissue-transplanted rat heart tissues, were deparaffinized, rehydrated,  
268 and permeabilized with Triton X-100. Samples were blocked with 5% bovine serum albumin  
269 (MP Biomedicals, Solon, OH, USA) containing 2% horse serum (Thermo Fisher Scientific)  
270 for at least 2 h at room temperature. Samples were incubated overnight at 4°C with the  
271 following primary antibodies: mouse anti-GATA-4 (#sc-25310, 1:200, Santa Cruz  
272 Biotechnology, Dallas, TX, USA), mouse anti- $\alpha$ -actinin (#A7811, 1:400, Sigma-Aldrich),  
273 rabbit anti-cardiac troponin T (cTnT, #ab45932, 1:400, Abcam), mouse anti-cardiac troponin  
274 T (#MA5-12960, 1:100, Thermo Fisher Scientific), mouse anti-cardiac troponin T (#ab8295,  
275 1:200, Abcam), rabbit anti-cardiac troponin I (cTnI, #ab47003, 1:200, Abcam), rabbit anti-  
276 connexin-43 (CX43, #C6219, 1:200, Sigma-Aldrich), rabbit anti-connexin-43 (#ab11370,  
277 1:300, Abcam), mouse anti-CD31 (#BBA7, 10  $\mu$ g/ml, R&D Systems), rabbit anti-CD31  
278 (#ab28364, 1:200, Abcam), mouse anti-DDR2 (#sc-81707, 1:200, Santa Cruz  
279 Biotechnology), mouse anti-vimentin (VIM, #MAB1681, 1:100, Millipore Corporation,  
280 Burlington, MA, USA), rabbit anti-collagen type 1 (#234167, 1:200, Millipore Corporation),  
281 mouse anti- $\alpha$ -smooth muscle actin ( $\alpha$ -SMA, #sc-53142, 1:200, Santa Cruz Biotechnology),  
282 rat anti-CD11b (#ab8878, 1:200, Abcam), mouse anti-CD45 (#AF114, 200  $\mu$ g/ml, R&D  
283 Systems), mouse anti-inducible nitric oxide synthase (iNOS, #sc7271, 1:200, Santa Cruz  
284 Biotechnology), rabbit anti-CD206 (#ab64693, 1:200, Abcam), mouse anti-CD80 (#MA5-  
285 42562, 1:100, Thermo Fisher Scientific), rabbit anti-CD163 (#ab182422, 1:200, Abcam), and  
286 rabbit anti-cleaved caspase-3 (#9661S, 1:400, Cell Signaling Technology, Danvers, MA,  
287 USA). Samples were washed three times with PBS and incubated with the following species-

288 specific fluorescence-conjugated secondary antibodies for 24 h at 4°C: anti-mouse Alexa  
289 Fluor 488 (#A11001, 1:200, Thermo Fisher Scientific), anti-rabbit Alexa Fluor 488  
290 (#A11008, 1:200, Thermo Fisher Scientific), anti-mouse Alexa Fluor 488 (#A21202, 1:500,  
291 Thermo Fisher Scientific), anti-rabbit Alexa Fluor 488 (#A21206, 1:500, Thermo Fisher  
292 Scientific), anti-rat Alexa Fluor 488 (#A11006, 1:200, Thermo Fisher Scientific), anti-rabbit  
293 Alexa Fluor 555 (#4413S, 1:500, Cell Signaling Technology), anti-mouse Alexa Fluor 594  
294 (#A11005, 1:200, Thermo Fisher Scientific), anti-rabbit Alexa Fluor 594 (#A11012, 1:200,  
295 Thermo Fisher Scientific), and anti-rabbit Alexa Fluor 647 (#A31573, 1:500, Thermo Fisher  
296 Scientific). Samples were washed with PBS and counterstained with 2-(4-  
297 amidinophenyl)indole-6-carboxamide dihydrochloride (DAPI, 1:500, TCI). F-actin staining  
298 was performed using rhodamine phalloidin solution (#R415, 1:400, Thermo Fisher  
299 Scientific). T-tubule staining was performed using fluorescein isothiocyanate (FITC)-  
300 conjugated WGA (#L4859, 5 µg/ml, Sigma-Aldrich) and denatured collagen staining was  
301 performed using collagen hybridizing peptide (CHP, #FLU300, 20 µM, 3HELIX, Salt Lake  
302 City, UT, USA). Images of stained samples were acquired using confocal microscopy  
303 (LSM900, Carl Zeiss, Jena, Germany).

304

### 305 **Quantitative PCR (qPCR) analysis**

306 To investigate gene expression in cardiac tissues, mRNA was extracted from the tissues using  
307 an RNeasy Mini Kit (Qiagen, Hilden, Germany). cDNA was prepared using a cDNA  
308 synthesis kit (#6110A, TaKaRa). qPCR analysis was performed using TaqMan Fast Universal  
309 PCR Master Mix (Thermo Fisher Scientific) on a StepOnePlus Real-Time PCR System  
310 (Thermo Fisher Scientific). The following primers for qPCR were used: *NPPA*  
311 (Hs00383230\_g1), *TNNT2* (Hs00943911\_m1), *TNNI1* (Hs00913333\_m1), *TNNI3*  
312 (Hs00165957\_m1), *MYL2* (Hs00166405\_m1), *MYL7* (Hs01085598\_g1), *MYH6*

313 (Hs01101425\_m1), *MYH7* (Hs01110632\_m1), *SCN5A* (Hs00165693\_m1), *CACNA1C*  
314 (Hs00167681\_m1), *PECAMI* (Hs00169777\_m1), *CDH5* (Hs00901465\_m1), *vWF*  
315 (Hs01109446\_m1), *COL1A1* (Hs00164004\_m1), *PDGFRA* (Hs00998018\_m1), *SPARC*  
316 (Hs00234160\_m1), *SFRP2* (Hs00293258\_m1), *FOSL1* (Hs00759776\_s1), and *FBN1*  
317 (Hs00171191\_m1). The expression of each gene was normalized to that of glyceraldehyde 3-  
318 phosphate dehydrogenase (*GAPDH*; Hs02786624\_g1).

319

### 320 **RNA sequencing analysis**

321 RNA was extracted from cardiac tissue samples using an RNeasy Mini Kit (Qiagen) and  
322 transferred to DNA Link Inc. (Seoul, Korea) for RNA sequencing. Sequencing libraries were  
323 prepared using an Illumina TruSeq Stranded mRNA Library Prep Kit (Illumina, San Diego,  
324 CA, USA) according to the manufacturer's instructions. Libraries were pooled and sequenced  
325 using a NovaSeq 6000 platform (Illumina). Sequenced reads were mapped to a reference  
326 genome (Human hg19) using Tophat (v2.0.13). Differentially expressed genes (DEGs) were  
327 calculated using Cuffdiff (v2.2.1). DEGs with a 2-fold change and a false discovery rate  
328 (FDR) < 0.1 were selected for Gene Ontology (GO) analysis. Functional GO annotation was  
329 performed using the DAVID program (<https://david.ncifcrf.gov>). A heatmap was created  
330 using Cluster 3.0 and Java TreeView 1.2.0. A PCA plot was generated using the ggfortify and  
331 ggplot2 packages (version 3.3.5) in Rstudio (version 2022.02.3; RStudio, Boston, MA, USA).  
332 A dot plot for GO term visualization was generated using the ggplot2 package in Rstudio.

333

### 334 **Functional and ultrastructural analyses**

335 Contractility measurements of cardiac tissues in Figures 3g–i, 5a, b, 6c, d, and 6k and o were  
336 performed using contraction videos and the MUSCLEMOTION plugin for ImageJ  
337 software<sup>15</sup>. Contraction videos were acquired using an IX71 microscope (Olympus

338 Corporation) and Ocular image acquisition software (Teledyne Photometrics, Birmingham,  
339 UK). Contraction parameters were calculated from the mean values of several peaks from  
340 each cardiac tissue and beats per minute (BPM) were calculated from the peak-to-peak time.  
341 For electrical pacing experiments, biphasic electrical pulses (3 V, 1 Hz, and 100 msec)  
342 optimized for cardiac tissues were applied using a WPG100e electrochemical workstation  
343 (WonATech, Seoul, Korea). Calcium transient analysis of cardiac tissues was performed  
344 using 5  $\mu$ M Fluo-4 AM staining (Thermo Fisher Scientific). Cardiac tissues were treated with  
345 Fluo-4 AM and incubated for 30 min at 37°C. Fluorescent videos of calcium transients were  
346 obtained using an IX71 microscope and Ocular image acquisition software. Cardiac tissue  
347 sections and ultrastructures of CMs were observed using field emission-scanning electron  
348 microscopy (FE-SEM, Teneo VS, FEI, Hillsboro, OR, USA). Cardiac tissues were sectioned  
349 using an ultramicrotome (RMC MTXL; Tucson, AZ, USA).

350

### 351 **Contractility assay**

352 For contractility tests, cardiac tissues were treated with 10  $\mu$ M epinephrine (Sigma-Aldrich)  
353 and 10  $\mu$ M isoproterenol (Sigma-Aldrich). Changes in contraction frequency were analyzed  
354 using MUSCLEMOTION. Separately, cardiac tissues were treated with various  
355 concentrations of nifedipine (Sigma-Aldrich), and contractility was analyzed using  
356 SoftEdge<sup>TM</sup> Acquisition software (IonOptix, Milton, MA, USA) as shown in Figure 5c and  
357 Supplementary Figure 6. Specifically, cardiac tissues were paced on the recording chamber  
358 perfused with a physiological Tyrode solution (120 mM NaCl, 5.4 mM KCl, 5 mM MgSO<sub>4</sub>,  
359 0.2 mM CaCl<sub>2</sub>, 5 mM Na-pyruvate, 5.5 mM glucose, 20 mM taurine, 10 mM HEPES, and 29  
360 mM mannitol, pH 7.4, NaOH) at 3 ml/min. Electrical field stimuli were applied using an  
361 electric stimulator (MyoPacer, IonOptix), and only tissues that beat stably were used in the  
362 drug tests. Contraction-relaxation waves were monitored and recorded digitally using

363 SoftEdge™ Acquisition software, which detects motion at the boundary of cardiac tissues.  
364 All experiments were conducted at  $36 \pm 1^\circ\text{C}$ . Waveforms were collected and analyzed at  
365 baseline (control) and at each testing concentration of nifedipine (a negative inotrope). The  
366 waveforms from at least 10 steady-state contractions were averaged for the control and each  
367 dose of nifedipine. Three parameters for cardiac contractility, including peak shortening,  
368 contraction velocity, and relaxation velocity, were analyzed.

369

### 370 **Multi-electrode array (MEA) assay**

371 Cardiac tissues were treated with various concentrations of E-4031 (Sigma-Aldrich) and  
372 nifedipine, and electrophysiological changes in response to the drugs were detected using  
373 MEA assays. Eight drugs with known clinical Torsades de Pointes (TdP) risks were  
374 evaluated, including seven drugs (vandetanib, bepridil, quinidine, chlorpromazine,  
375 terfenadine, clarithromycin, and diltiazem) purchased from Sigma-Aldrich and one drug  
376 (ranolazine) purchased from USP (Rockville, MD, USA). For all test drugs, 1000× stock  
377 solutions were prepared for the highest test concentration in dimethyl sulfoxide (DMSO).  
378 Stock solutions were serially diluted in DMSO. MEA assays were performed using a Maestro  
379 MEA system with 12-well MEA plates (Axion BioSystems Inc., Atlanta, GA, USA). Multi-  
380 well MEA plates were pre-coated with fibronectin (50  $\mu\text{g}/\text{mg}$ ) for 30 min in a 5%  $\text{CO}_2$   
381 incubator at  $37^\circ\text{C}$ . Cardiac tissues were plated on the MEA plates and allowed to attach to the  
382 wells for 30 min at  $37^\circ\text{C}$ . Cardiac tissues were maintained on MEA plates for 5–7 days with a  
383 half-volume medium change every 2–3 days. On the day of assessment, the medium was  
384 fully replaced at least 4 h before the recordings to allow for equilibration and correction of  
385 medium volume.

386         After docking the MEA plate containing the cardiac tissues on the MEA equipment,  
387 the device automatically adjusted and maintained the temperature at  $37^\circ\text{C}$  and  $\text{CO}_2$  level at

388 5%. Baseline levels were recorded for 1 min at 5-min intervals for a total of 30 min. The  
389 experimental protocol employed an accumulative treatment, which consisted of the  
390 administration of four serial concentrations of each test drug. During drug testing, MEA  
391 signals were recorded for 1 min at 5-min intervals for a total of 20 min for each dose. Drug  
392 administration was performed by gentle manual pipetting. A volume of 100  $\mu$ l of medium  
393 was removed from the MEA plate and mixed with 1  $\mu$ l of stock solution for each dose and  
394 gently returned to the MEA plate along the edge of the well. Data from the last 1-min  
395 recording of each drug dose were analyzed offline using AxIS software (version 2.3.2.4,  
396 Axion BioSystems Inc.). Three major parameters were derived from the cardiac field  
397 potential under baseline (control) and post-dose conditions, including BPM, field potential  
398 amplitude (FPA), and FPD<sub>CF</sub>, which represented the field potential duration corrected heart  
399 rate using Fridericia's formula<sup>16</sup>.

400 To assess the electrophysiological characteristics of our LQTS cardiac tissues, an  
401 MEA system (Tucker-Davis Technologies Inc, Alachua, FL, USA) was used, which consisted  
402 of RZ2 amplifier processor, PZ5 Neurodigitizer, MZ60 MEA interface, and a computer with  
403 Synapse program. The recordings were performed at a sampling rate of 24,414 Hz with 60  
404 Hz notch filter and a 0.1–300 Hz bandpass filter.

405

#### 406 **Evaluation of heart function by echocardiography**

407 Echocardiography was used for functional evaluation of ischemia/reperfusion-injured hearts.  
408 Rats were lightly anesthetized with 2% isoflurane. Data were recorded using a transthoracic  
409 echocardiography system equipped with a 15-MHz L15-7io linear transducer (Affiniti50G;  
410 Philips, Andover, MA, USA). Base echocardiography was performed 1 week after  
411 ischemia/reperfusion modeling, and additional echocardiography was performed 1, 2, 4, and  
412 6 weeks after cardiac tissue transplantation. The echocardiography operator was blinded to



413 the group allocation during the experiment. Ejection fraction (EF) and fractional shortening  
414 (FS), which are indexes of left ventricular (LV) systolic function, were calculated with the  
415 values of left ventricular end-diastolic volume (LVEDV), left ventricular end-systolic volume  
416 (LVESV), left ventricular end-diastolic diameter (LVEDD), and left ventricular end-systolic  
417 diameter (LVESD) using the following equations, respectively:

$$418 \text{ EF (\%)} = [(LVEDV-LVESV)/LVEDV] \times 100$$

$$419 \text{ FS (\%)} = [(LVEDD-LVESD)/LVEDD] \times 100$$

420

### 421 **Hemodynamic measurements**

422 Hemodynamic measurements were performed before euthanasia at 4 weeks post-  
423 transplantation. Rats were lightly anesthetized with 2% isoflurane, and thoracotomy was  
424 performed without bleeding. The LV apex of the heart was pierced with a 26-gauge needle  
425 and a 2F conductance catheter (SPR-838; Millar Instruments, Houston, TX, USA) was placed  
426 in the LV. The pressure-volume (PV) parameters were uninterruptedly recorded using a PV  
427 conductance system (MPVS Ultra; emka TECHNOLOGIES, Paris, France) coupled with a  
428 digital converter (PowerLab 16/35; ADInstruments, Chalgrove, UK). Cardiac output, stroke  
429 volume, maximal rate of pressure changes during systole ( $dp/dt_{max}$ ), minimal rate of pressure  
430 changes during diastole ( $dp/dt_{min}$ ), and maximum volume at end-diastole ( $V_{max}$ ) were  
431 quantified using recorded values. Load-independent measurements of cardiac function,  
432 including the slopes of the end-systolic pressure-volume relationship (ESPVR) and end-  
433 diastolic pressure-volume relationship (EDPVR), were achieved with different preloads,  
434 which were elicited by inferior vena cava (IVC) occlusion using a needle holder. Hypertonic  
435 saline (50  $\mu$ l of 20% NaCl) was injected into the left jugular vein to evaluate parallel  
436 conductance after hemodynamic measurements. For calibrating the data, blood was collected  
437 from the LV apex using heparinized syringes and placed into cuvettes to convert the

438 conductance signal to volume using the catheter. The absolute blood volume of rat hearts was  
439 confirmed by calibrating the parallel conductance and the cuvette conductance.

440

#### 441 **Electrocardiogram (ECG) analysis of transplanted rat heart**

442 ECG analysis was performed 6 weeks after transplantation using a Langendorff isolated heart  
443 perfusion system. Rats were anesthetized using 2% isoflurane (Hana Pharm, Seongnam,  
444 Korea), and their hearts were rapidly excised and mounted on an aortic cannular. Then, the  
445 hearts were perfused with oxygenated (95% O<sub>2</sub> + 5% CO<sub>2</sub>) modified Krebs-Henseleit buffer  
446 (pH 7.4) containing 11.1 mM glucose, 118 mM NaCl, 4.69 mM KCl, 2.0 mM CaCl<sub>2</sub>, 1.17  
447 mM MgSO<sub>4</sub>, 1.18 mM KH<sub>2</sub>PO<sub>4</sub>, and 25 mM NaHCO<sub>3</sub>, and maintained at 37°C. The hearts  
448 were perfused at a constant flow rate of 15 ml/min, and ECG electrodes were attached to the  
449 epicardium. Data were recorded using the PowerLab system (ADInstruments). Following a  
450 20-minute stabilization period, ECG measurements were taken over a 10-minute duration.

451

#### 452 **Quantitative image analysis of the myocardial infarction model**

453 To visualize the fibrosis area and viable myocardium in the injured hearts, paraffin-embedded  
454 heart tissues were sectioned and stained with Masson's trichrome. The fibrotic region (blue)  
455 and viable myocardium (red) areas were quantified manually using ImageJ software.

456 Capillary density, engrafted hiPSC-CM, and lateralized CX43 were quantified using the  
457 count values from immunofluorescent images of CD31<sup>+</sup> capillary, RFP<sup>+</sup> human cTnT<sup>+</sup> cells,  
458 and lateralized CX43<sup>+</sup> junctions, respectively. The number of total CMs was calculated as the  
459 number of cTnT<sup>+</sup> cells, and the denatured collagen area was quantified by measuring the  
460 CHP<sup>+</sup> region. Quantification of immunofluorescent images was conducted in three randomly  
461 selected microscopic fields (/mm<sup>2</sup>) per tissue.

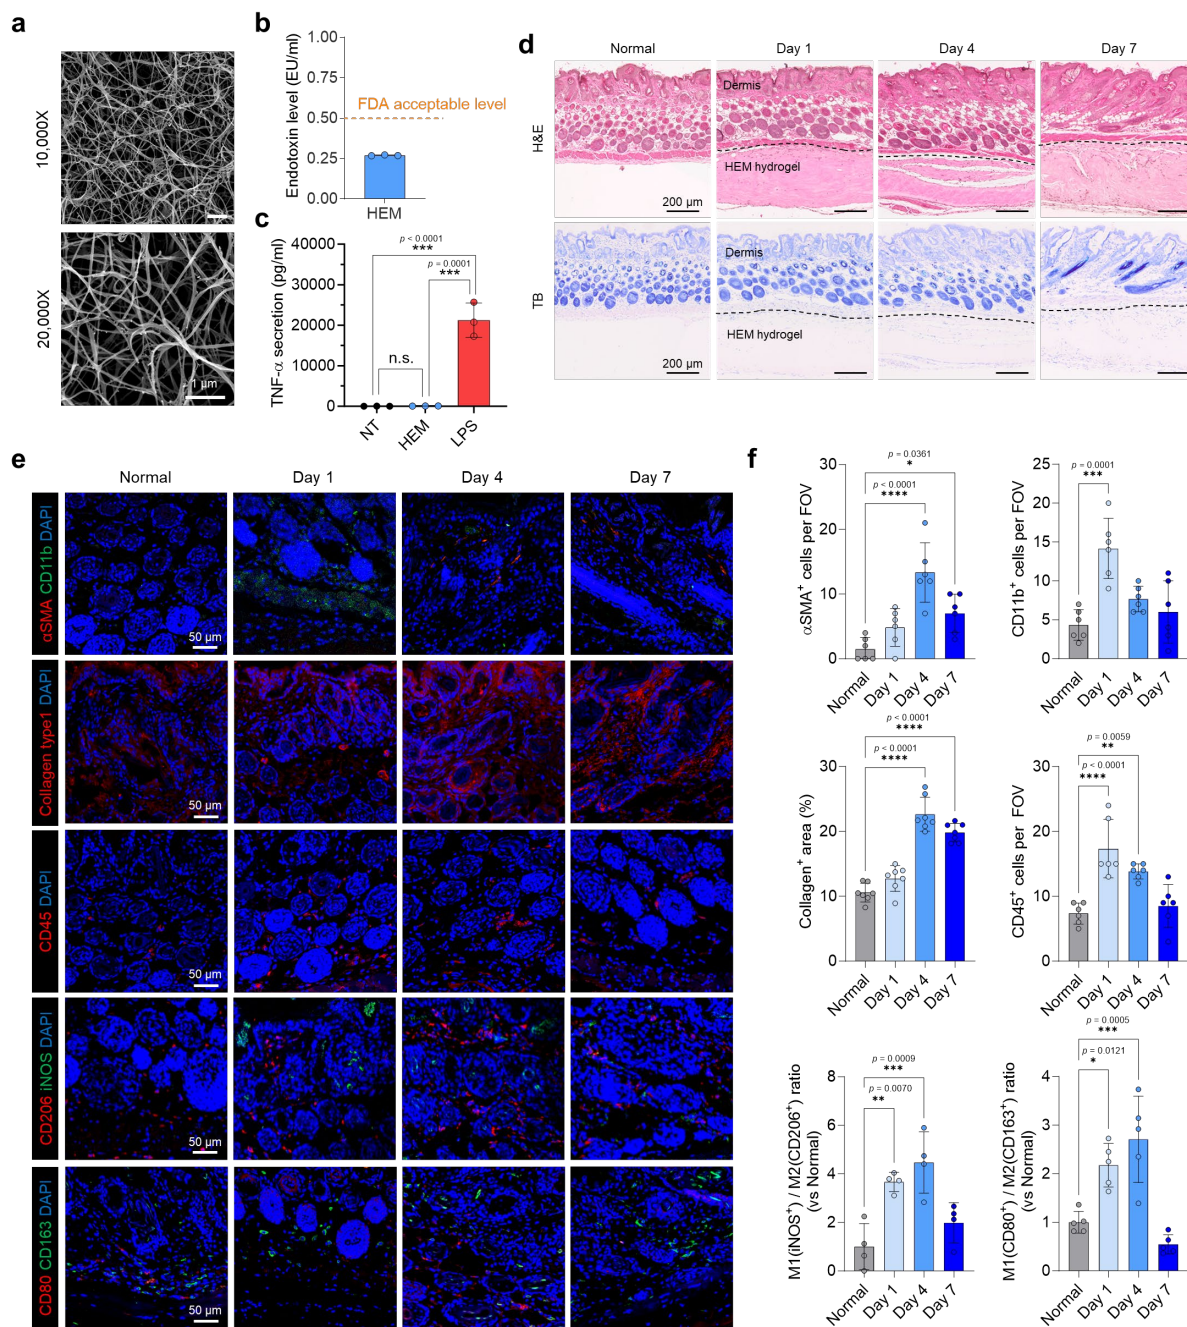

463

464 **Supplementary Figure 1. Fabrication of heart extracellular matrix (HEM) hydrogel and**  
 465 **biocompatibility evaluation *in vitro* and *in vivo*.** (a) Scanning electron microscopy images  
 466 showing internal ultrastructures of HEM hydrogels (scale bars = 1  $\mu$ m). (b) Endotoxin levels  
 467 detected in HEM hydrogels. The yellow dotted line indicates the acceptable level according  
 468 to the Food and Drug Administration for medical devices in humans. (c) Tumor necrosis  
 469 factor- $\alpha$  (TNF- $\alpha$ ) secretion levels by RAW 264.7 macrophages cultured with HEM hydrogels  
 470 for 6 h ( $N = 3$ , biological replicates, \*\*\* $p < 0.001$ ). Macrophages treated with 1  $\mu$ g/ml

471 lipopolysaccharide (LPS) were used for control. **(d)** Hematoxylin and eosin (H&E) staining  
472 and toluidine blue (TB) staining of skin tissues from mice that received a subcutaneous  
473 injection of HEM hydrogels (scale bars = 200  $\mu\text{m}$ ). **(e)** Immunofluorescent images of  
474 activated fibroblasts ( $\alpha$ -SMA and Collagen type 1), immune cells (CD11b and CD45), M1  
475 macrophages (iNOS and CD80), and M2 macrophages (CD206 and CD163) at the  
476 subcutaneous injection site of mice 1, 4, and 7 days after HEM hydrogel injection (scale bars  
477 = 50  $\mu\text{m}$ ,  $N = 4$  for iNOS/CD206 images,  $N = 5$  for CD80/CD163 images,  $N = 6$  for  $\alpha$ -  
478 SMA/CD11b and CD45 images, and  $N = 7$  for collagen type 1 images, biological replicates).  
479 **(f)** Quantification of  $\alpha$ -SMA<sup>+</sup>, CD11b<sup>+</sup>, CD45<sup>+</sup> cell counts per field of view (FOV), collagen<sup>+</sup>  
480 area, and M1/M2 ratio (iNOS<sup>+</sup>/CD206<sup>+</sup> and CD80<sup>+</sup>/CD163<sup>+</sup>) in subcutaneous injection site  
481 ( $N = 4$  for iNOS<sup>+</sup>/CD206<sup>+</sup>,  $N = 5$  for CD80<sup>+</sup>/CD163<sup>+</sup>,  $N = 6$  for  $\alpha$ -SMA<sup>+</sup>, CD11b<sup>+</sup>, CD45<sup>+</sup>  
482 cell counts, and  $N = 7$  for collagen<sup>+</sup> area, biological replicates, \* $p < 0.05$ , \*\* $p < 0.01$ , \*\*\* $p <$   
483 0.001, and \*\*\*\* $p < 0.0001$  versus Normal). Data are presented as means  $\pm$  S.D. Statistical  
484 significance was determined using one-way ANOVA with Tukey's multiple comparisons  
485 tests. Non-significant statistical differences are indicated as n.s. ( $p > 0.05$ ).

486

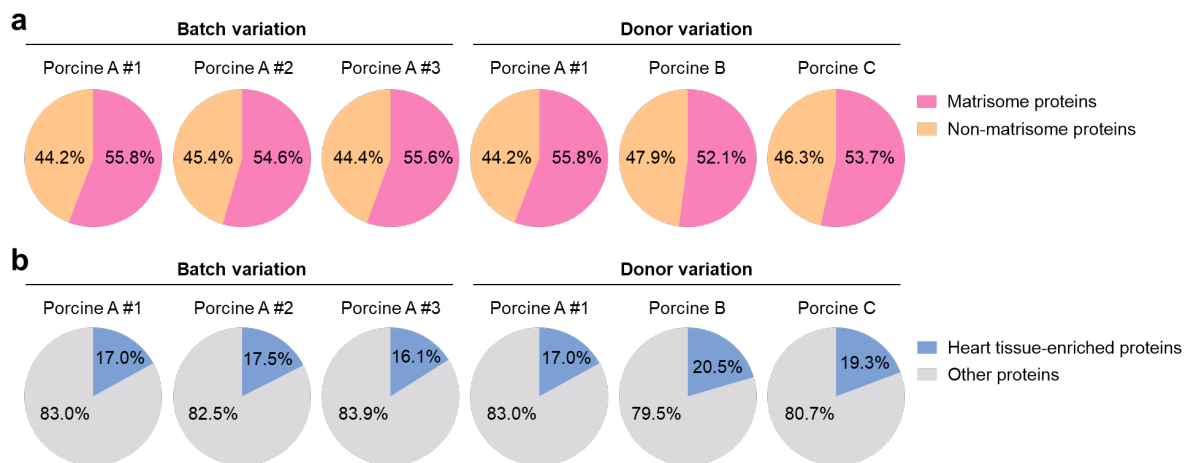

487

488

489

490

491

492

493

494

**Supplementary Figure 2. Proteomic analysis of variation between different batches and donors of porcine heart extracellular matrix (HEM).** (a) Relative ratio of matrisome proteins and non-matrisome proteins, and (b) percentage of heart tissue-enriched proteins (4-fold higher than other tissues) among the total proteins in porcine HEM samples derived from different batches (#1, #2, and #3 from donor A) and donors (A, B, and C) ( $N = 3$ , biological replicates).

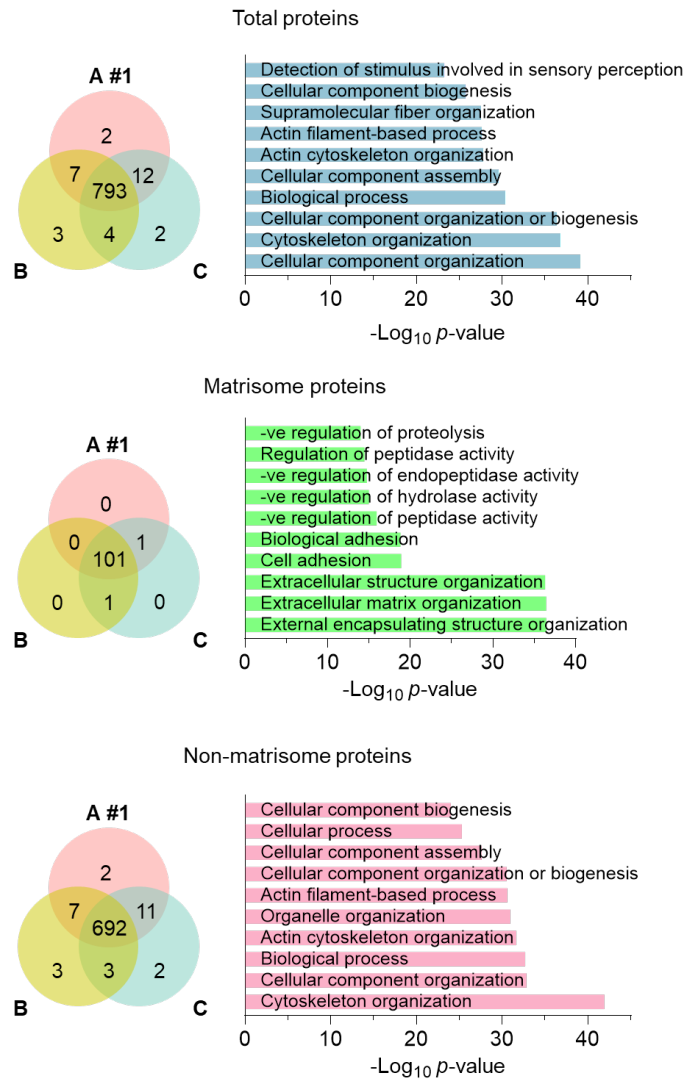

495

496 **Supplementary Figure 3. Proteomic analysis to identify overlapped proteins (total**  
 497 **proteins, matrisome proteins, and non-matrisome proteins) in porcine heart**  
 498 **extracellular matrix (HEM) samples derived from different donors (A, B, and C) and**  
 499 **Gene Ontology Biological Process (GOBP) analysis ( $N = 3$ , biological replicates).**

500

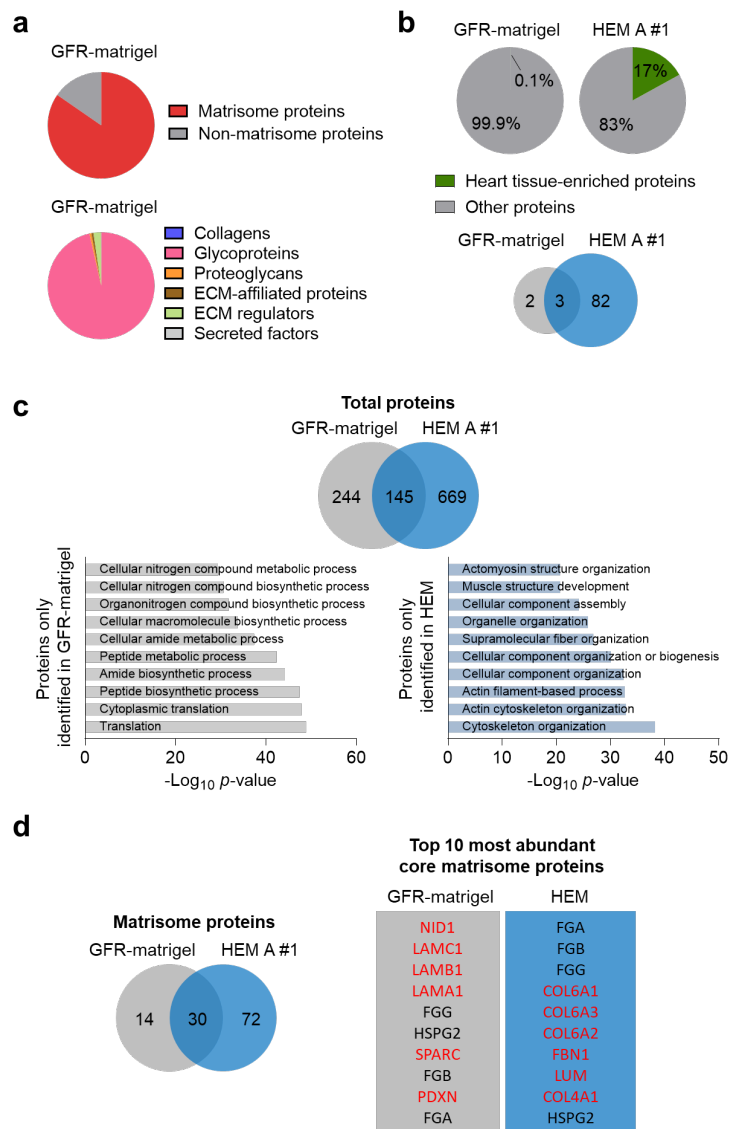

501

502 **Supplementary Figure 4. Proteomic analysis comparing proteins in porcine heart**  
 503 **extracellular matrix (HEM) with those in growth factor reduced Matrigel (GFR-**  
 504 **Matrigel).** (a) Ratios of matrisome proteins and non-matrisome proteins in GFR-Matrigel  
 505 and extracellular matrix (ECM) compositions in GFR-Matrigel. (b) Portion and number of  
 506 heart tissue-enriched proteins (4-fold higher than other tissues) among total proteins  
 507 contained in GFR-Matrigel and HEM. (c) Number of total proteins contained in GFR-  
 508 Matrigel and HEM and Gene Ontology Biological Process (GOBP) analysis of proteins only  
 509 identified in GFR-Matrigel or HEM. (d) Number of matrisome proteins and 10 most  
 510 abundant matrisome proteins in GFR-Matrigel and HEM ( $N = 1$  for GFR-Matrigel and  $N = 3$   
 511 for HEM, biological replicates). The mean value of three biological replicates was used for  
 512 HEM.

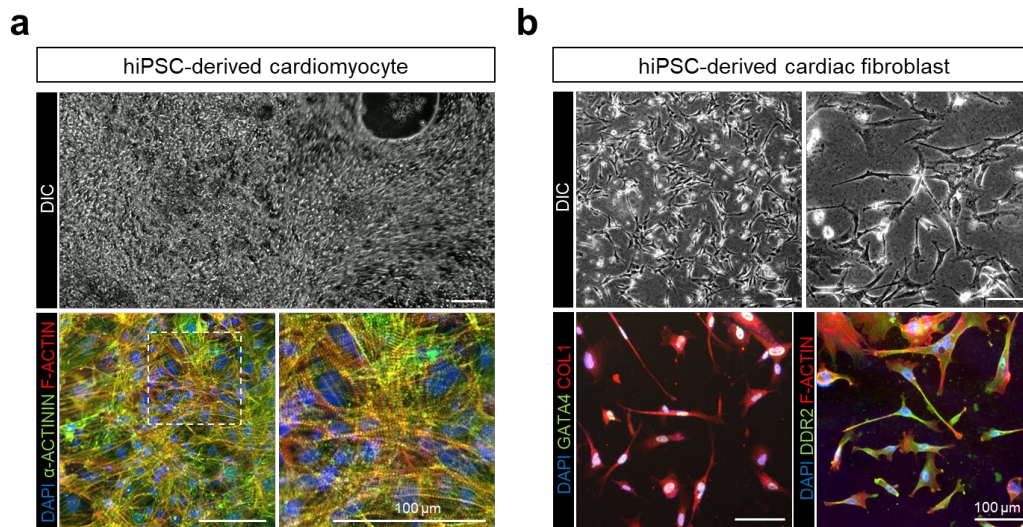

513

514 **Supplementary Figure 5. Differentiation of cardiomyocytes (CMs) and cardiac**  
 515 **fibroblasts (CFs) from human induced pluripotent stem cells (hiPSCs).** (a) Bright-field  
 516 images of CMs differentiated from hiPSCs for 14 days and immunofluorescent images of  $\alpha$ -  
 517 actinin and F-actin in CMs (scale bars = 100  $\mu$ m). (b) Bright-field images of CFs  
 518 differentiated from hiPSCs for 22 days and immunofluorescent images of GATA4, COL1,  
 519 DDR2, and F-actin in CFs (scale bars = 100  $\mu$ m).

520



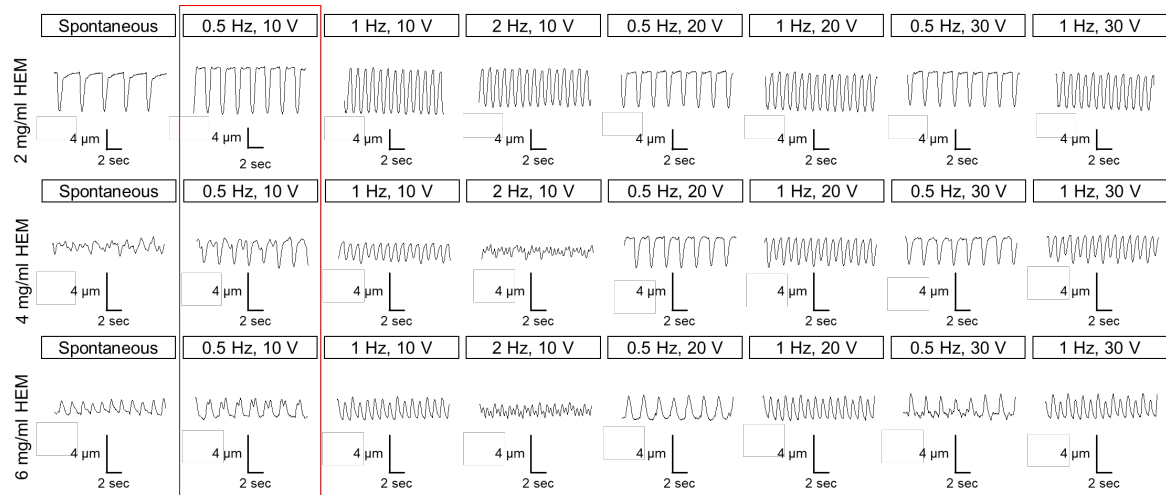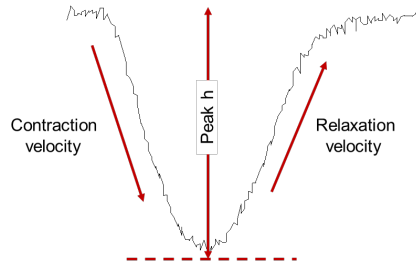

| Parameters                        | HEM concentration |                 |                 |
|-----------------------------------|-------------------|-----------------|-----------------|
|                                   | 2 mg/ml (N = 3)   | 4 mg/ml (N = 3) | 6 mg/ml (N = 3) |
| Beating condition at 10 V, 0.5 Hz | regular           | irregular       | irregular       |
| Peak h (μm)                       | 6.14 ± 0.04       | irregular       | irregular       |
| Dep v (μm/ms)                     | -70.80 ± 9.12     | irregular       | irregular       |
| Ret v (μm/ms)                     | 14.99 ± 0.13      | irregular       | irregular       |
| Time to peak 50%                  | 0.09 ± 0.00       | irregular       | irregular       |
| Time to baseline 50%              | 0.83 ± 0.00       | irregular       | irregular       |
| Area of contraction               | 1.56 ± 0.02       | irregular       | irregular       |
| Area of relaxation                | 3.03 ± 0.08       | irregular       | irregular       |

521

522 **Supplementary Figure 6. Contractility of human cardiac tissues fabricated with**  
 523 **different concentrations of heart extracellular matrix (HEM) hydrogels.** Cardiac tissues  
 524 prepared with human induced pluripotent stem cell (hiPSC)-derived cardiomyocytes (CMs),  
 525 cardiac fibroblasts (CFs), and human umbilical cord vein endothelial cells (HUVECs) were  
 526 cultured for 7–14 days before analysis. Contraction traces and contraction parameters for  
 527 each cardiac tissue electrically paced with various voltages and frequencies ( $N = 3$ , biological  
 528 replicates). The red box indicates the optimal condition of electrical stimulation (10 V and 0.5  
 529 Hz) to detect differences between groups. Contraction analysis was performed using  
 530 SoftEdge™ Acquisition software.

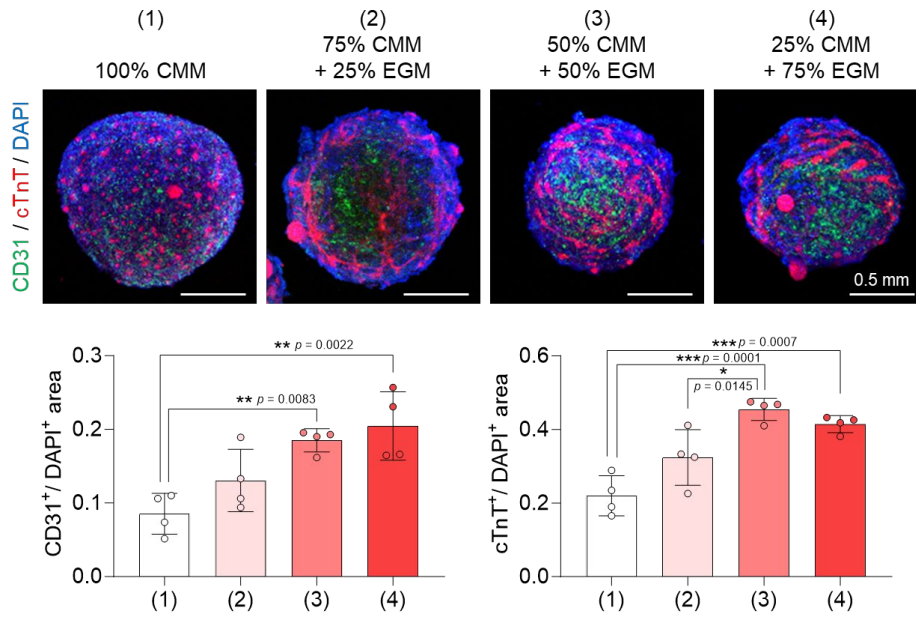

531

532 **Supplementary Figure 7. Screening of co-culture conditions for human cardiac tissues**  
 533 **composed of cardiomyocytes (CMs), endothelial cells (EC), and cardiac fibroblasts**  
 534 **(CFs). Immunofluorescent images and quantification of CM (cTnT) and EC (CD31) markers**  
 535 **in cardiac tissues cultured in medium at different ratios of CM medium (CMM) and EC**  
 536 **medium (EGM) (scale bars = 0.5 mm,  $N = 4$ , biological replicates,  $*p < 0.05$ ,  $**p < 0.01$ , and**  
 537  **$***p < 0.001$ ). Cardiac tissues were cultured for 7 days. Data are presented as means  $\pm$  S.D.**  
 538 **Statistical significance was determined using one-way ANOVA with Tukey's multiple**  
 539 **comparisons tests.**

540

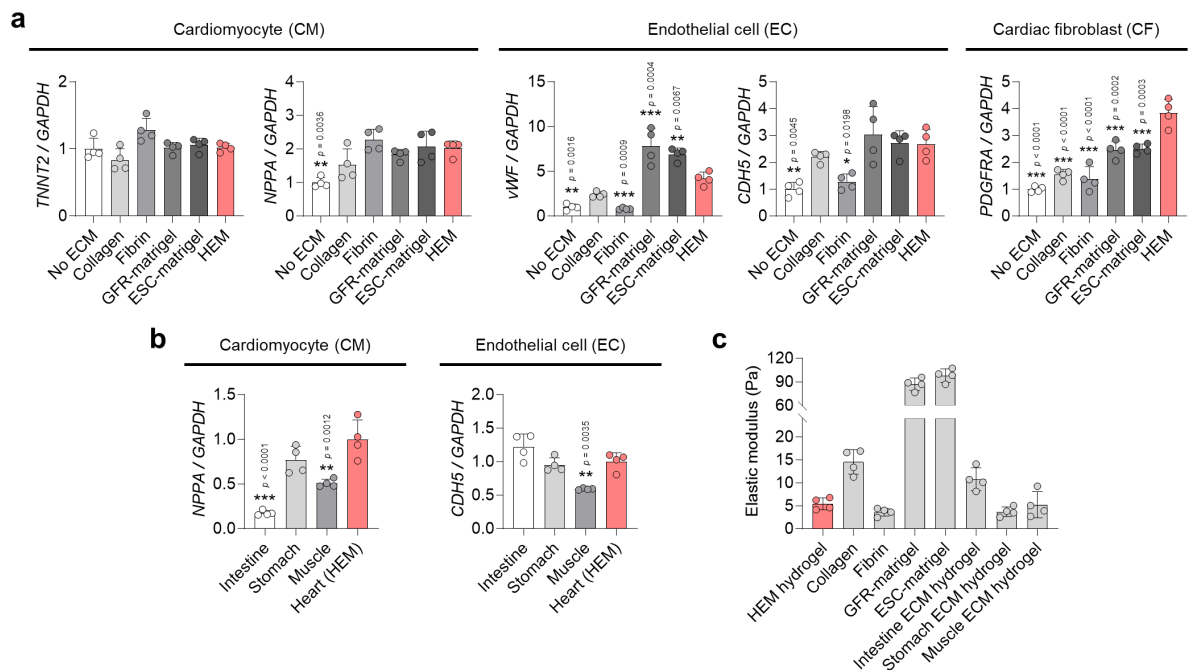

541

542 **Supplementary Figure 8. mRNA expression levels in human cardiac tissues fabricated**  
 543 **using heart extracellular matrix (HEM) hydrogel or other hydrogels. (a)** Quantitative  
 544 PCR analysis of relative mRNA expression levels of CM (*TNNT2* and *NPPA*), EC (*vWF* and  
 545 *CDH5*), and CF (*PDGFRA*) markers in each group of cardiac tissues ( $N = 4$ , biological  
 546 replicates,  $*p < 0.05$ ,  $**p < 0.01$ , and  $***p < 0.001$  versus HEM group). Conventional  
 547 hydrogels were used as control matrices for cardiac tissue culture. **(b)** Quantitative PCR  
 548 analysis of relative mRNA expression levels of CM (*NPPA*) and EC (*CDH5*) markers in each  
 549 group of cardiac tissues ( $N = 4$ , biological replicates,  $**p < 0.01$  and  $***p < 0.001$  versus  
 550 HEM group). Extracellular matrix (ECM) hydrogels from other decellularized tissues were  
 551 used as control matrices for cardiac tissue culture. Cardiac tissues were cultured for 7 days in  
 552 **(a)** and **(b)**. **(c)** Elastic moduli of HEM hydrogel, conventional hydrogels, and ECM  
 553 hydrogels from other decellularized tissues ( $N = 4$ , biological replicates). Data are presented  
 554 as means  $\pm$  S.D. Statistical significance was determined using one-way ANOVA with Tukey's  
 555 multiple comparisons tests.

556

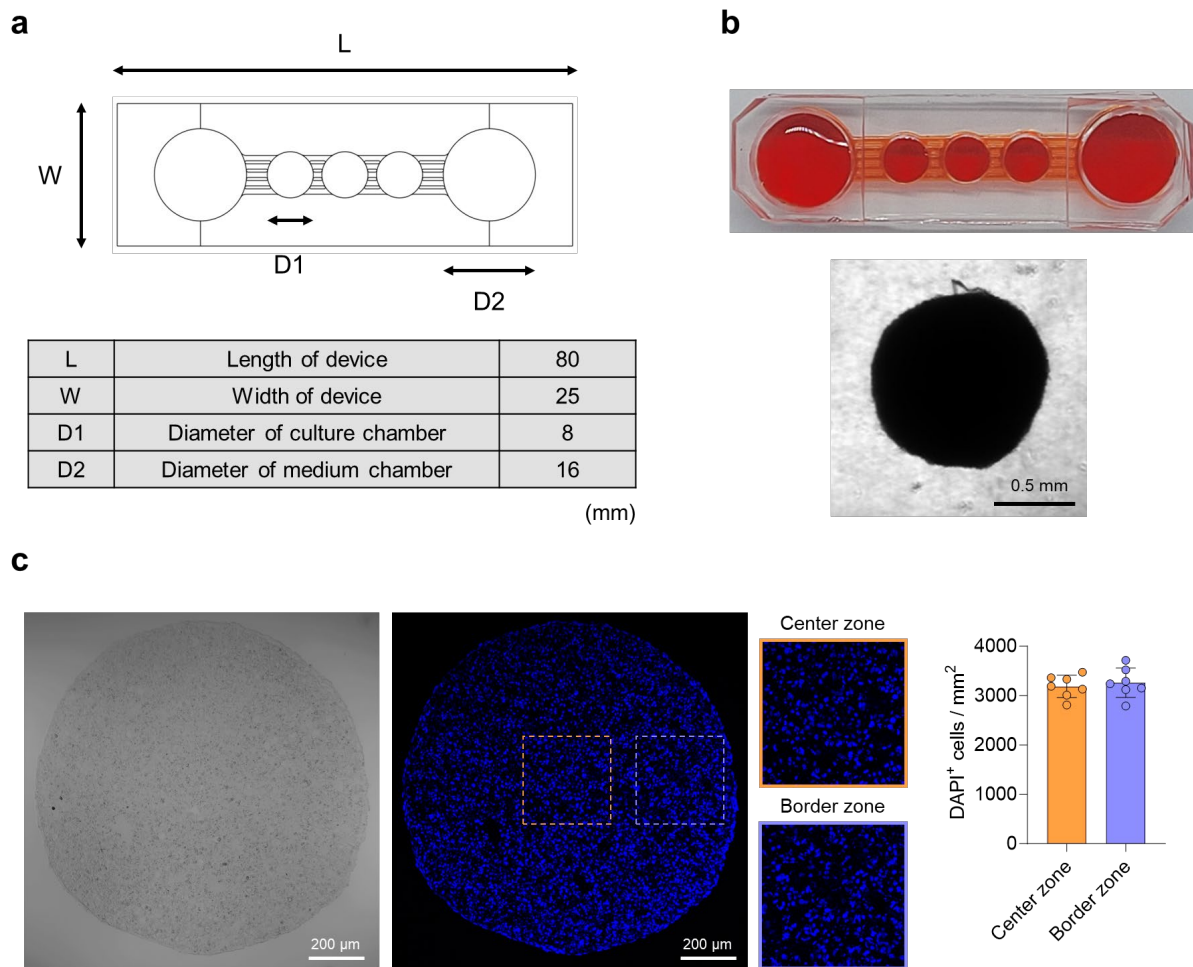

557

558

559

560

561

562

563

564

565

566

**Supplementary Figure 9. Fabrication of microfluidic chips for human cardiac tissue culture and cell density across the diameter of human cardiac tissues.** (a) Schematic of the microfluidic chip indicating the dimensions, culture chamber, and medium chamber. (b) Photograph of the microfluidic chip and bright-field image of cardiac tissue in the culture chamber (scale bar = 0.5 mm). (c) Bright-field and DAPI staining images of cardiac tissue section 1 day after the fabrication with heart extracellular matrix (HEM) hydrogel. DAPI<sup>+</sup> cells in center zone and border zones within cardiac tissues were quantified (scale bars = 200 μm,  $N = 7$ , biological replicates). Data are presented as means  $\pm$  S.D.

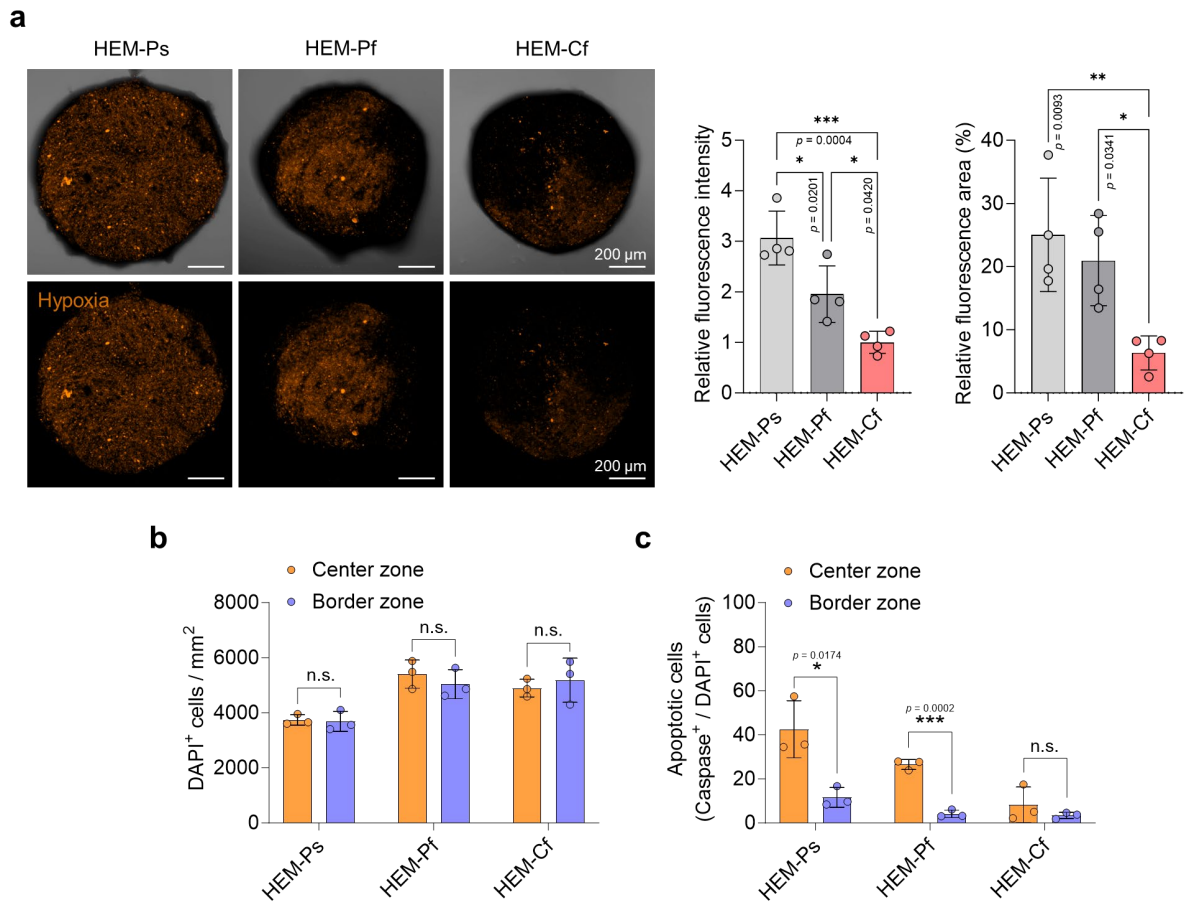

567

568 **Supplementary Figure 10. Comparison of oxygen levels and apoptotic cell density in**

569 **human cardiac tissues. (a)** Fluorescent images of live cardiac tissues stained with Image-

570 iT<sup>TM</sup> red hypoxia reagent and quantification of relative fluorescence intensity and area. The

571 cardiac tissues were fabricated using heart extracellular matrix (HEM) hydrogel and then

572 cultured in 24-well plates without flow (HEM-Ps; Plate static), 24-well plates with flow

573 (HEM-Pf; Plate flow), and microfluidic chips with flow (HEM-Cf; Chip flow) for 14 days

574 (scale bars = 200  $\mu$ m,  $N = 4$ , biological replicates, \* $p < 0.05$ , \*\* $p < 0.01$ , and \*\*\* $p < 0.001$ ).

575 **(b)** Quantification of DAPI<sup>+</sup> cells and **(c)** apoptotic cells (Caspase<sup>3+</sup>/DAPI<sup>+</sup>) in center zone

576 and border zones within cardiac tissues of each group ( $N = 3$ , biological replicates, \* $p < 0.05$

577 and \*\*\* $p < 0.001$ ). Immunofluorescent images of Figure 3d were used for quantification in

578 **(b)** and **(c)**. Data are presented as means  $\pm$  S.D. Statistical significance was determined using

579 one-way ANOVA with Tukey's multiple comparisons tests in **(a)** and unpaired two-sided

580 Student's  $t$ -tests in **(b)** and **(c)**. Non-significant statistical differences are indicated as n.s. ( $p >$

581 0.05).

582

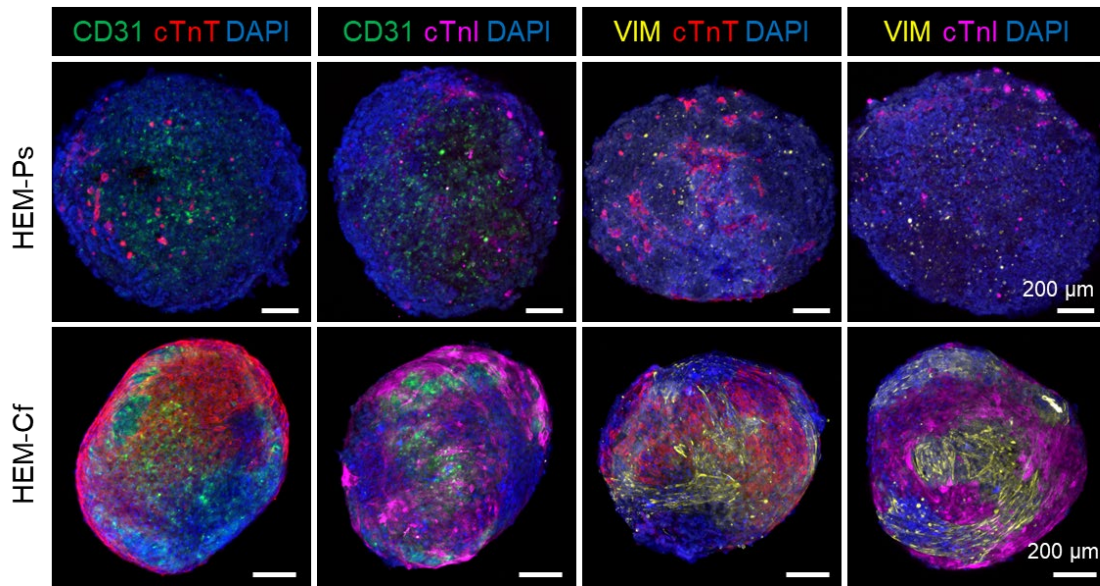

583

584 **Supplementary Figure 11. Overall protein expression in human cardiac tissues**  
 585 **fabricated with heart extracellular matrix (HEM) hydrogel and cultured in well plates**  
 586 **without flow (HEM-Ps) and in microfluidic chips with flow (HEM-Cf).**

587 Immunofluorescent images of cardiomyocyte (CM; cTnT and cTnI), EC (CD31), and CF  
 588 (VIM) markers in each group of cardiac tissues cultured for 14 days (scale bars = 200 μm).

589

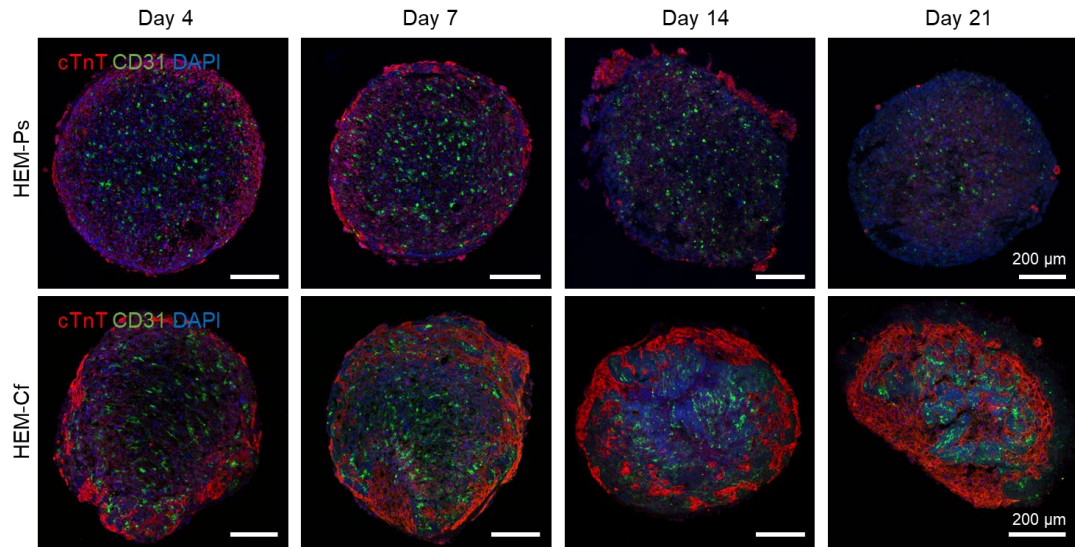

590

591 **Supplementary Figure 12. Protein expression in the section of human cardiac tissues**  
 592 **fabricated with heart extracellular matrix (HEM) hydrogel and cultured in well plates**  
 593 **without flow (HEM-Ps) and in microfluidic chips with flow (HEM-Cf).**

594 Immunofluorescent images of cardiomyocyte (CM; cTnT) and EC (CD31) markers in the  
 595 section of each group of cardiac tissues cultured for 4, 7, 14, and 21 days (scale bars = 200  
 596 μm).

597

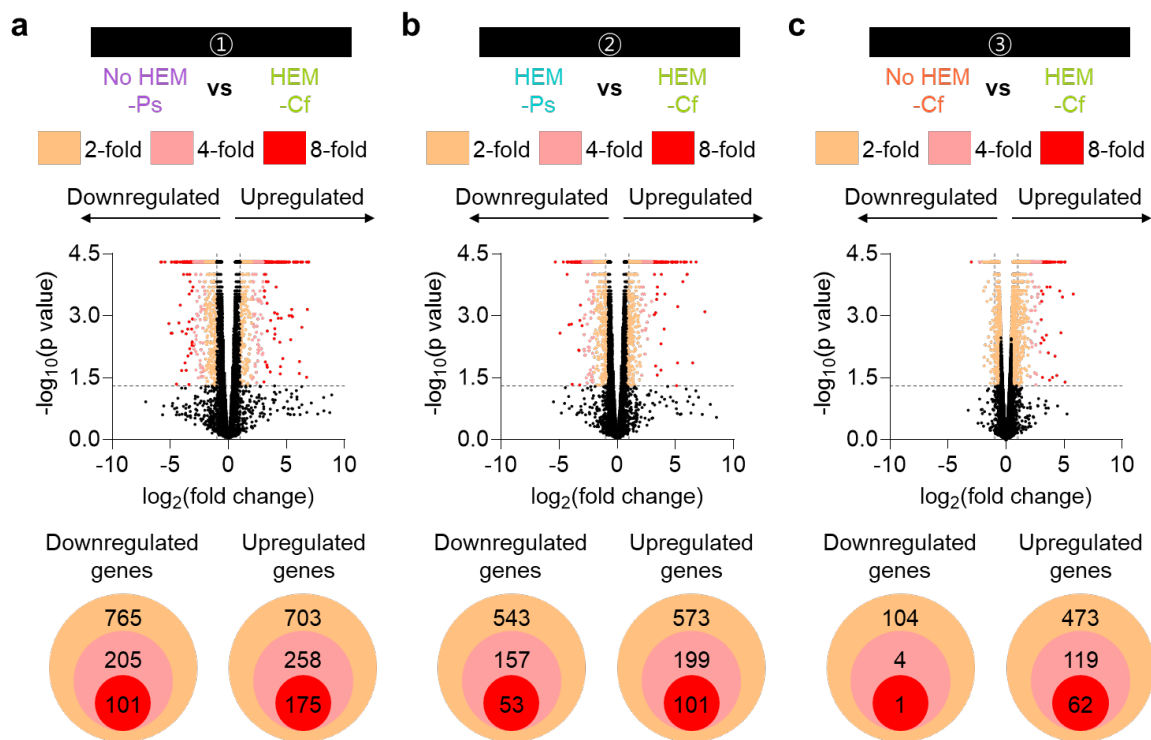

598

599

600

601

602

603

604

605

606

607

608

609

610

611

**Supplementary Figure 13. Transcriptomic analysis of differentially expressed genes (DEGs) in human cardiac tissues fabricated with heart extracellular matrix (HEM) hydrogel and cultured in microfluidic chip with flow (HEM-Cf) compared to other groups. (a, b, c) Volcano plots displaying genes upregulated or downregulated in the HEM-Cf group as compared to the cardiac tissues fabricated with U-bottom plate and cultured in 24-well plate under static condition (① No HEM-Ps group), cardiac tissues fabricated with HEM hydrogel and cultured in 24-well plate under static condition (② HEM-Ps group), and cardiac tissues fabricated with U-bottom plate and cultured in microfluidic chip with flow (③ No HEM-Cf group). Venn diagram illustrating the number of upregulated and downregulated genes according to fold changes. Cardiac tissues prepared with human induced pluripotent stem cell (hiPSC)-derived cardiomyocytes (CMs), cardiac fibroblasts (CFs), and human umbilical cord vein endothelial cells (HUVECs) were cultured for 14 days.**





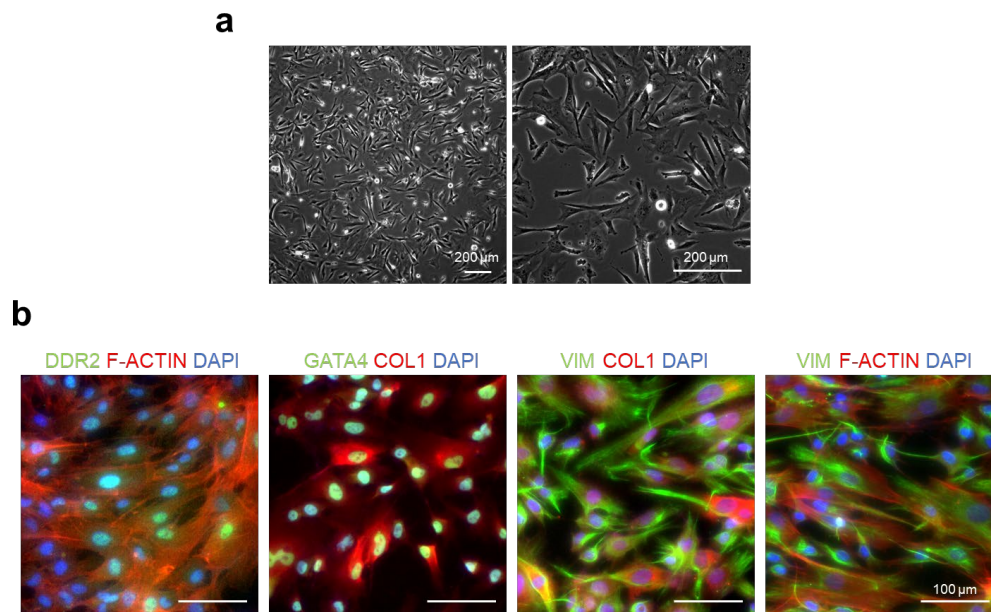

631

632 **Supplementary Figure 15. Differentiation toward cardiac fibroblasts (CFs) from LQT2**  
 633 **patient induced pluripotent stem cells (iPSCs).** (a) Bright-field images of LQT2-CFs (scale  
 634 bars = 200  $\mu\text{m}$ ). (b) Immunofluorescent images of DDR2, GATA4, COL1, VIM, and F-actin  
 635 in LQT2-CFs (scale bars = 100  $\mu\text{m}$ ). LQT2-CFs were cryopreserved after full differentiation  
 636 on day 22. Images were obtained using LQT2-CFs cultured over three passages post-  
 637 cryopreservation.

638

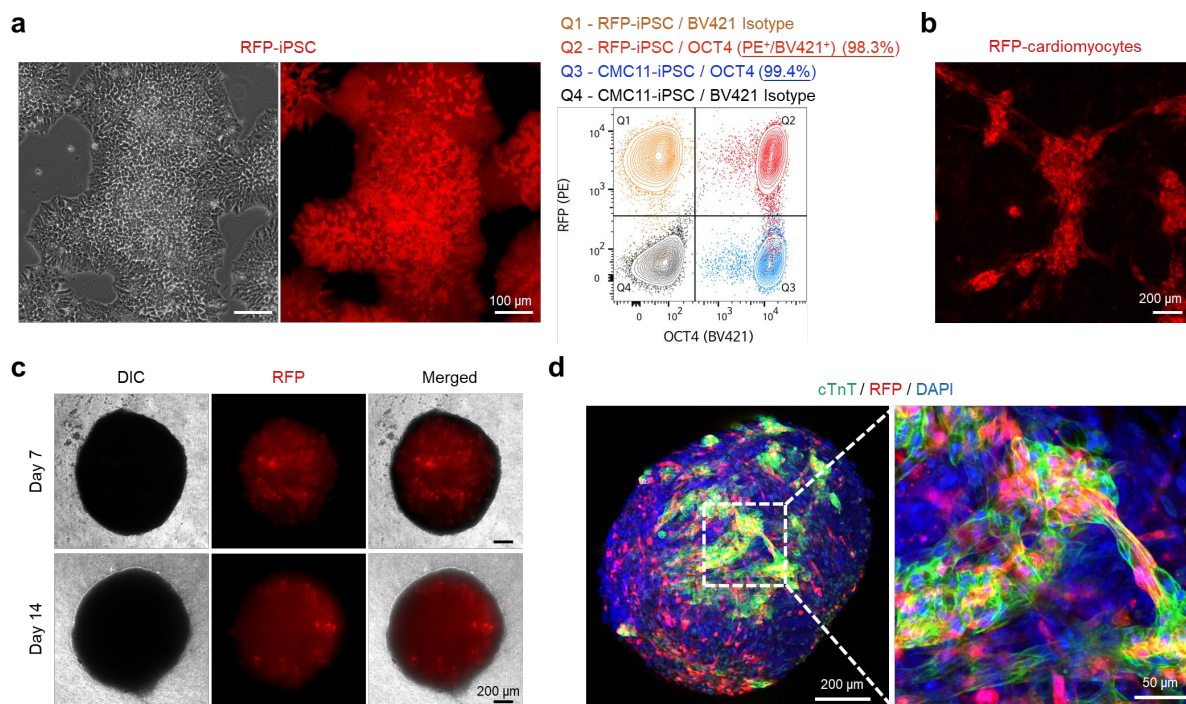

639

640 **Supplementary Figure 16. Development of human cardiac tissues containing red**  
 641 **fluorescent protein (RFP)-expressing cardiomyocytes (CMs) for transplantation. (a)**  
 642 **Bright-field and fluorescent images of human induced pluripotent stem cells (hiPSCs)**  
 643 **expressing RFP (scale bars = 100  $\mu$ m). OCT4 expression in RFP-iPSCs was verified by**  
 644 **comparing wild-type iPSCs (CMC11-iPSCs) with RFP-iPSCs using fluorescence-activated**  
 645 **cell sorting (FACS) analysis. (b) Fluorescent image of CMs differentiated from RFP-iPSCs**  
 646 **(scale bar = 200  $\mu$ m). (c) Bright-field, fluorescent, and merged images of cardiac tissues**  
 647 **fabricated using RFP-CMs (scale bars = 200  $\mu$ m). (d) Immunofluorescent images of CMs**  
 648 **(cTnT) in cardiac tissues fabricated using RFP-CMs (scale bar = 200  $\mu$ m for the left image**  
 649 **and 50  $\mu$ m for the right image). Cardiac tissues were cultured for 7 days.**

650

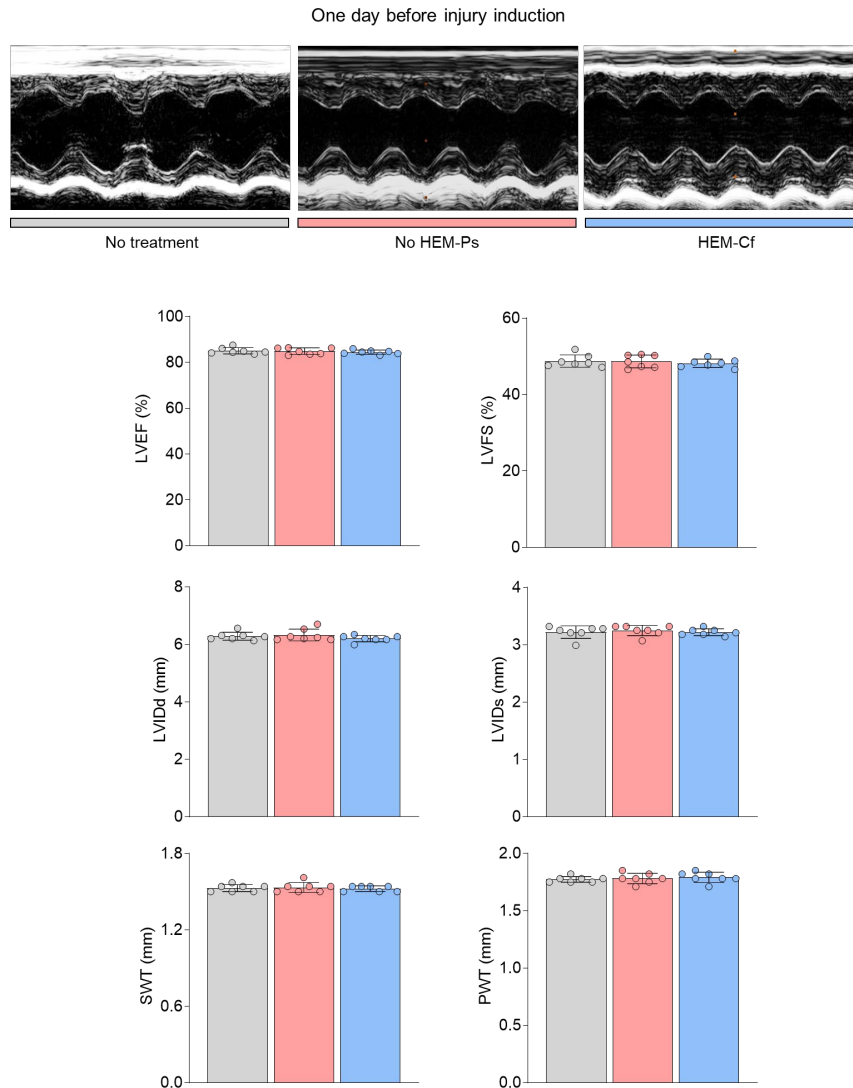

651

652 **Supplementary Figure 17. Representative echocardiography images, heart functions,**  
 653 **and left ventricular (LV) dimensions measured one day before ischemia/reperfusion**  
 654 **injury induction.** All groups (No treatment, No HEM-Ps, and HEM-Cf) showed the normal  
 655 state of rats because the analysis was conducted before injury. Human cardiac tissues that  
 656 were fabricated with U-bottom plate and cultured in 24-well plate under static condition (No  
 657 HEM-Ps) or with heart extracellular matrix (HEM) hydrogel and cultured in microfluidic  
 658 chip with flow (HEM-Cf) were transplanted to the rats allocated to each group one week after  
 659 the injury. Left ventricular ejection fraction (LVEF), left ventricular fractional shortening  
 660 (LVFS), left ventricular internal diameter end-diastole (LVIDd), and left ventricular internal  
 661 diameter end-systole (LVIDs), septal wall thickness (SWT), and posterior wall thickness  
 662 (PWT) were quantified ( $N = 7$ , biological replicates). Data are presented as means  $\pm$  S.D.  
 663

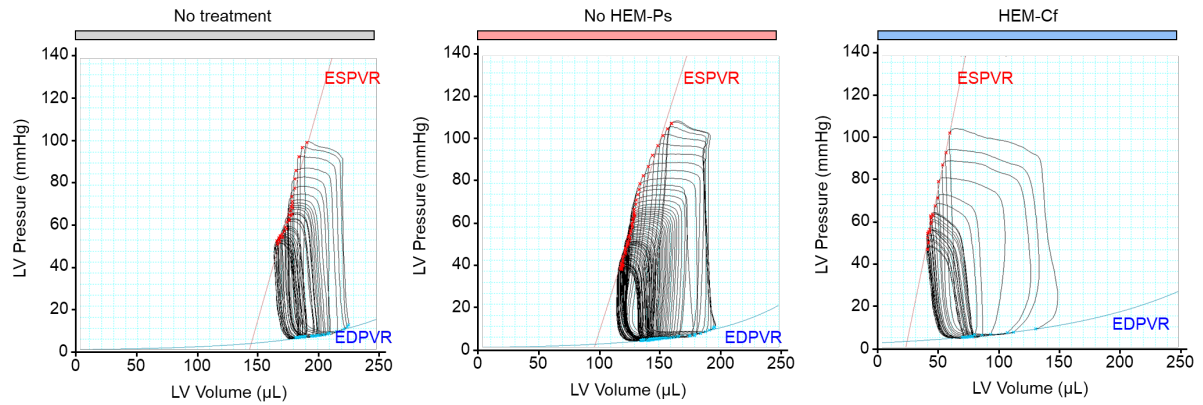

664

665 **Supplementary Figure 18. Representative graphs of the slope of end-systolic pressure-**  
 666 **volume relationship (ESPVR) and the slope of end-diastolic pressure-volume**  
 667 **relationship (EDPVR) as measured by transient inferior vena cava (IVC) occlusion.**

668 Hemodynamic measurements were performed 4 weeks post-transplantation. For  
 669 transplantation, cardiac tissues prepared with human induced pluripotent stem cell (hiPSC)-  
 670 derived red fluorescent protein (RFP)<sup>+</sup> cardiomyocytes (CMs), cardiac fibroblasts (CFs), and  
 671 human umbilical cord vein endothelial cells (HUVECs) were cultured under each condition  
 672 for 9 days.

673

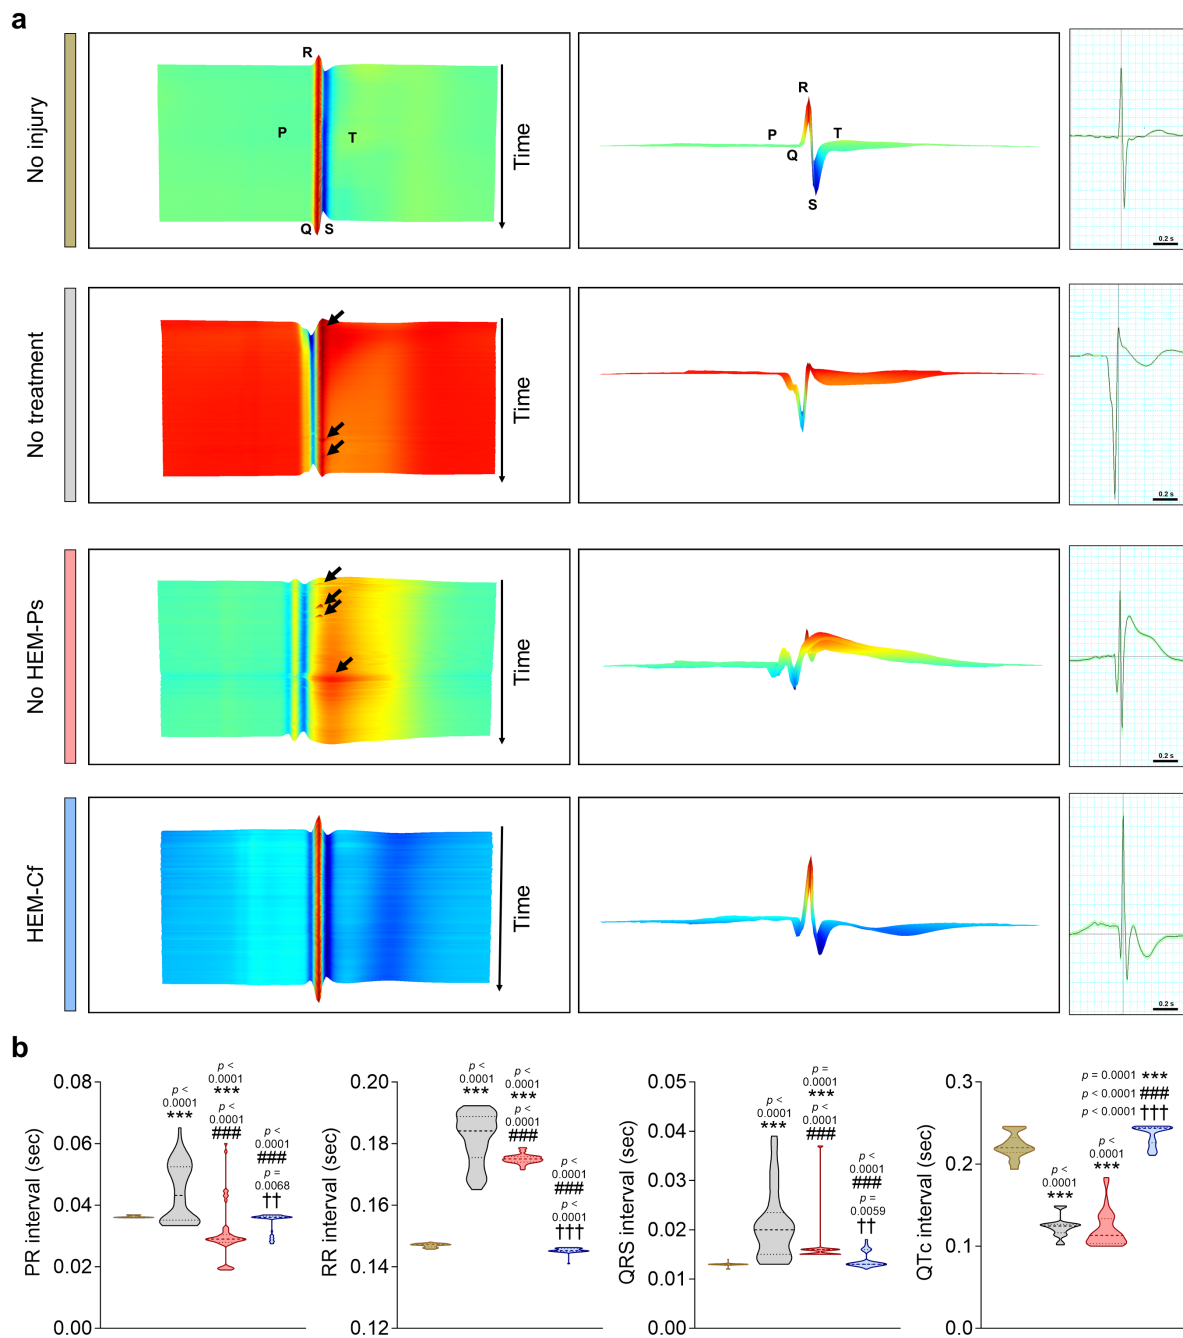

675 **Supplementary Figure 19. Electrocardiogram (ECG) measurement using a Langendorff**  
 676 **isolated heart perfusion system. (a)** Representative waterfall plot mapping images of ECG  
 677 recorded for 10 min at 6 weeks after transplantation. The black arrows indicate premature  
 678 beats (scale bars = 0.2 sec). **(b)** The quantification of PR, RR, QRS and corrected QT (QTc)  
 679 intervals recorded in each group ( $N = 50$  from 5 biological replicates,  $***p < 0.001$  versus No  
 680 injury group,  $####p < 0.001$  versus No treatment group,  $\dagger\dagger p < 0.01$ , and  $\dagger\dagger\dagger p < 0.001$  versus No  
 681 HEM-PS group). Data are presented as violin plot. Statistical significance was determined  
 682 using one-way ANOVA with Tukey's multiple comparisons tests.

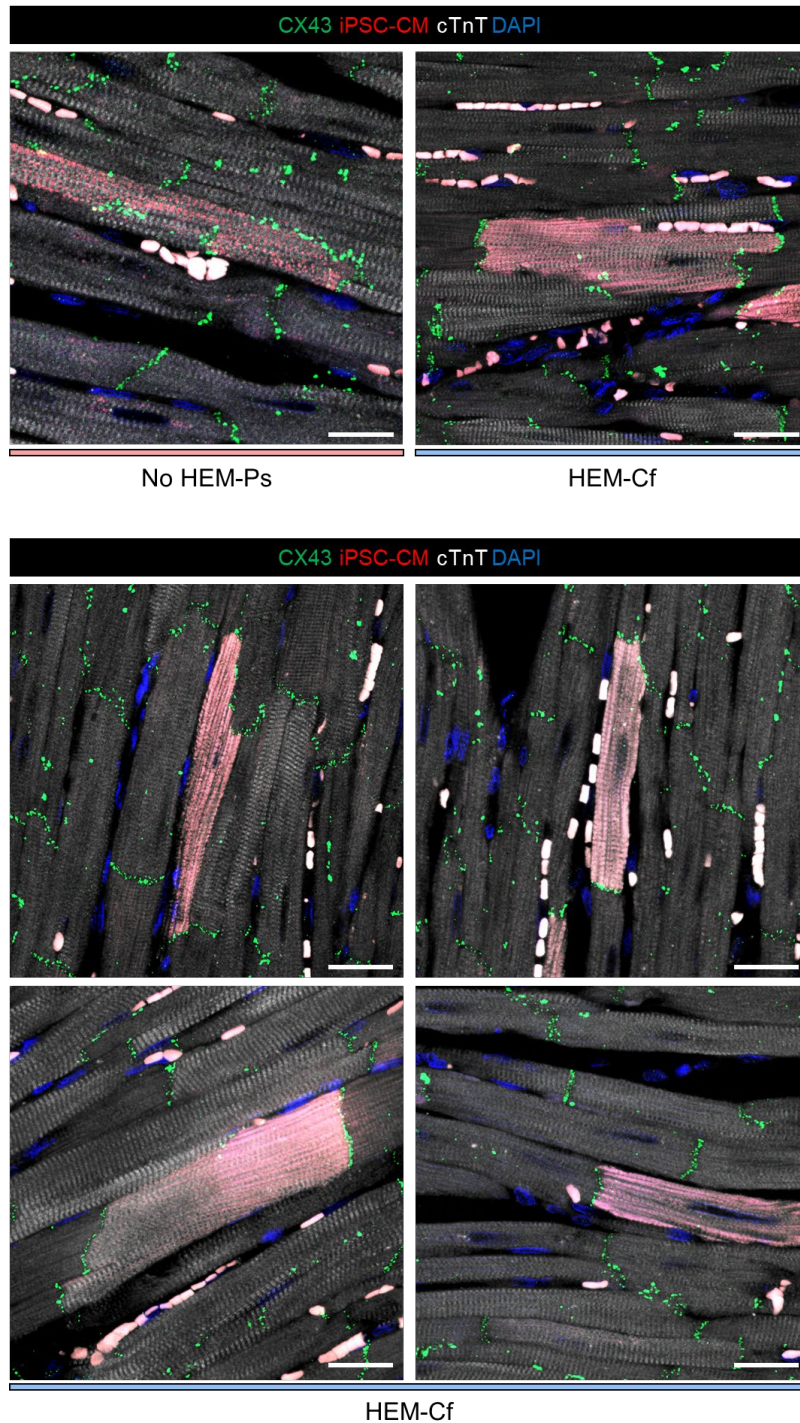

683

684 **Supplementary Figure 20. High-magnification immunofluorescent images of gap**  
 685 **junctions expressed in transplanted red fluorescent protein (RFP)<sup>+</sup> cardiomyocytes**  
 686 **(CMs) incorporated into host CMs.** Gap junctions were stained with CX43 (green) and  
 687 total CMs were stained with cTnT (white) 6 weeks post-transplantation (scale bars = 100  
 688 μm).

689

690

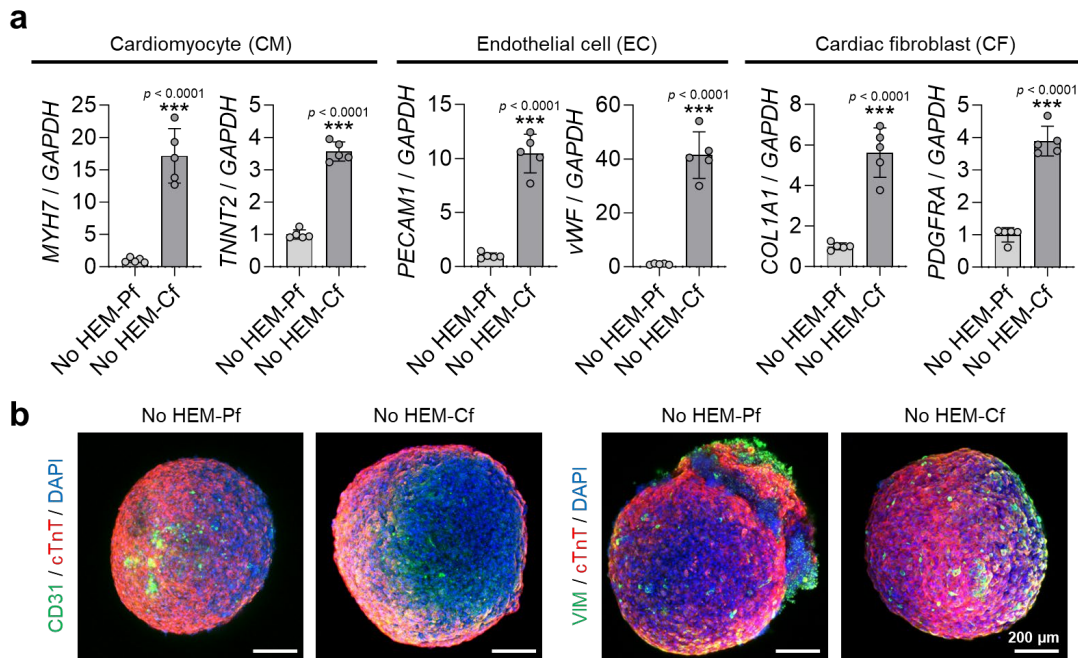

691

692

693

694

695

696

697

698

699

700

701

702

703

**Supplementary Figure 21. The influence of dynamic flow via microfluidic chip on**

**human cardiac tissues fabricated without heart extracellular matrix (HEM) hydrogels**

**(No HEM).** (a) Quantitative PCR analysis of relative mRNA expression levels of

cardiomyocyte (CM; *MYH7* and *TNNT2*), endothelial cell (EC; *PECAM1* and *vWF*), and

cardiac fibroblast (CF; *COL1A1* and *PDGFRA*) markers in each group of cardiac tissues ( $N =$

5, biological replicates,  $***p < 0.001$ ). (b) Immunofluorescent images of CM (cTnT), EC

(CD31), and CF (VIM) markers in each group of cardiac tissues (scale bars = 200  $\mu\text{m}$ ).

Cardiac tissues were cultured in 24-well plates with flow (No HEM-Pf; Plate flow) or

microfluidic chips with flow (No HEM-Cf; Chip flow) for 7 days. Data are presented as

means  $\pm$  S.D. Statistical significance was determined using unpaired two-sided Student's *t*-

tests.



704 **REFERENCES**

- 705 1. Lee, J.S. et al. Liver extracellular matrix providing dual functions of two-dimensional  
706 substrate coating and three-dimensional injectable hydrogel platform for liver tissue  
707 engineering. *Biomacromolecules* **15**, 206-218 (2014).
- 708 2. Smarr, B.L., Grant, A.D., Zucker, I., Prendergast, B.J. & Kriegsfeld, L.J. Sex differences  
709 in variability across timescales in BALB/c mice. *Biol. Sex Differ.* **8**, 7 (2017).
- 710 3. Cox, J. & Mann, M. MaxQuant enables high peptide identification rates, individualized  
711 p.p.b.-range mass accuracies and proteome-wide protein quantification. *Nat.*  
712 *Biotechnol.* **26**, 1367-1372 (2008).
- 713 4. UniProt, C. UniProt: the universal protein knowledgebase in 2021. *Nucleic Acids Res.*  
714 **49**, D480-D489 (2021).
- 715 5. Naba, A. et al. The extracellular matrix: Tools and insights for the "omics" era. *Matrix*  
716 *Biol.* **49**, 10-24 (2016).
- 717 6. Thul, P.J. et al. A subcellular map of the human proteome. *Science* **356**, eaal3321  
718 (2017).
- 719 7. Ashburner, M. et al. Gene ontology: tool for the unification of biology. The Gene  
720 Ontology Consortium. *Nat. Genet.* **25**, 25-29 (2000).
- 721 8. Gene Ontology, C. The Gene Ontology resource: enriching a GOld mine. *Nucleic Acids*  
722 *Res.* **49**, D325-D334 (2021).
- 723 9. Hoang, P., Wang, J., Conklin, B.R., Healy, K.E. & Ma, Z. Generation of spatial-  
724 patterned early-developing cardiac organoids using human pluripotent stem cells. *Nat.*  
725 *Protoc.* **13**, 723-737 (2018).
- 726 10. Zhang, H. et al. Generation of Quiescent Cardiac Fibroblasts From Human Induced  
727 Pluripotent Stem Cells for In Vitro Modeling of Cardiac Fibrosis. *Circ. Res.* **125**, 552-  
728 566 (2019).
- 729 11. Cho, A.N. et al. Microfluidic device with brain extracellular matrix promotes structural  
730 and functional maturation of human brain organoids. *Nat. Commun.* **12**, 4730 (2021).
- 731 12. Jin, Y. et al. Vascularized Liver Organoids Generated Using Induced Hepatic Tissue  
732 and Dynamic Liver-Specific Microenvironment as a Drug Testing Platform. *Adv. Funct.*  
733 *Mater.* **28**, 1801954 (2018).
- 734 13. Richards, D.J. et al. Human cardiac organoids for the modelling of myocardial  
735 infarction and drug cardiotoxicity. *Nat. Biomed. Eng.* **4**, 446-462 (2020).
- 736 14. Sekine, K. et al. Oxygen consumption of human heart cells in monolayer culture.  
737 *Biochem. Biophys. Res. Commun.* **452**, 834-839 (2014).
- 738 15. Sala, L. et al. MUSCLEMOTION: A Versatile Open Software Tool to Quantify  
739 Cardiomyocyte and Cardiac Muscle Contraction In Vitro and In Vivo. *Circ. Res.* **122**,  
740 e5-e16 (2018).
- 741 16. Vandenberk, B. et al. Which QT Correction Formulae to Use for QT Monitoring? *J. Am.*  
742 *Heart Assoc.* **5**, e003264 (2016).

743
